# Supplementary material for: Phenolic Compounds as Phytochemical Tracers of Varietal Origin of Some Autochthonous Apple Cultivars Grown in Serbia
Source: MDPI journal article supplement (doi:10.3390/molecules27217651), 2022-11-07
Supplement: s1 [file s1]

# Phenolic Compounds as Phytochemical Tracers of Varietal Origin of Some Autochthonous Apple Cultivars Grown in Serbia

Nikola Horvacki <sup>1</sup>, Filip Andrić <sup>2</sup>, Uroš Gašić <sup>3</sup>, Dejan Đurović <sup>4</sup>, Živoslav Tešić <sup>2</sup>, Milica Fotirić Akšić <sup>4</sup> and Dušanka Milojković-Opsenica <sup>2,\*</sup>

<sup>1</sup>Innovation Center of the Faculty of Chemistry Ltd., Studentski trg 12-16, 11000 Belgrade, Serbia

<sup>2</sup>Faculty of Chemistry, University of Belgrade, P.O. Box 51, 11158 Belgrade, Serbia

<sup>3</sup>National Institute of Republic of Serbia, Institute for Biological Research "Siniša Stanković", University of Belgrade, 11060 Belgrade, Serbia

<sup>4</sup>Faculty of Agriculture, University of Belgrade, Nemanjina 6, 11080 Belgrade, Serbia

\* Correspondence: dusankam@chem.bg.ac.rs

## Content

- Table S1.** Total phenolic content (TPC), DPPH radical scavenging activity (RSA) and individual phenolics content in the samples.
- Table S2.** Comparison of TPC values in different cultivar groups and years.
- Table S3.** Comparison of DPPH radical inhibition values in different cultivar groups and years.
- Table S4.** Univariate test for significance of factor effects influencing total phenolic content (TPC) and DPPH radical scavenging activity (RSA) in the analysed samples.
- Table S5.** Overview of detected compounds by OrbiTrap in the analyzed mesocarp samples.

Table S1. Total phenolic content (TPC), DPPH radical scavenging activity (RSA) and individual phenolics content in the samples.

| Tissue                               | Mesocarp |       |       |       |       |        |       |       |       |       |       |        |        |       |        |
|--------------------------------------|----------|-------|-------|-------|-------|--------|-------|-------|-------|-------|-------|--------|--------|-------|--------|
| Year                                 | 2018     |       |       |       |       |        |       |       |       |       |       |        |        |       |        |
| Cultivar number <sup>1</sup>         | 1        | 2     | 3     | 4     | 5     | 6      | 7     | 8     | 9     | 10    | 11    | 12     | 13     | 14    | 15     |
| Type <sup>2</sup>                    | S        | S     | S     | S     | S     | R      | R     | R     | R     | R     | R     | A      | A      | A     | A      |
| TPC <sup>3</sup>                     | 0.49     | 1.41  | 0.67  | 0.62  | 0.46  | 0.92   | 0.39  | 0.27  | 0.33  | 0.64  | 0.53  | 2.44   | 0.82   | 1.03  | 4.51   |
| RSA <sup>4</sup>                     | 17.58    | 20.97 | 18.63 | 18.71 | 8.94  | 19.70  | 15.86 | 7.98  | 8.57  | 16.78 | 19.73 | 30.30  | 16.03  | 17.84 | 45.52  |
| 5-O-Caffeoylquinic acid <sup>5</sup> | 17.88    | 36.53 | 68.37 | 58.27 | 17.34 | 134.03 | 37.81 | 30.34 | 28.93 | 29.59 | 6.73  | 128.16 | 101.23 | 37.20 | 206.75 |
| Caffeic acid                         | 0.06     | 0.13  | 0.27  | 0.22  | 0.07  | 0.49   | 0.14  | 0.13  | 0.10  | 0.09  | 0.04  | 0.39   | 0.43   | 0.14  | 0.84   |
| Phloretin                            | 0.05     | 0.06  | 0.05  | 0.05  | 0.05  | 0.06   | 0.05  | 0.05  | 0.05  | 0.05  | 0.04  | 0.07   | 0.09   | 0.09  | 0.06   |
| Phlorizin                            | 1.24     | 2.52  | 2.05  | 2.87  | 0.46  | 3.82   | 0.83  | 0.78  | 0.57  | 0.75  | 0.34  | 2.50   | 4.28   | 3.32  | 4.94   |
| Quercetin                            | 0.10     | 0.11  | 0.13  | 0.21  | 0.11  | 0.25   | 0.12  | 0.08  | 0.06  | 0.03  | 0.11  | 0.29   | 0.44   | 0.26  | 0.24   |
| Rutin                                | 0.00     | 0.00  | 0.00  | 0.02  | 0.03  | 0.06   | 0.04  | 0.00  | 0.02  | 0.00  | 0.03  | 0.00   | 0.10   | 0.00  | 0.29   |
| Quercetin-3-O-glucoside              | 0.32     | 0.29  | 0.93  | 0.70  | 0.28  | 1.84   | 1.34  | 0.87  | 0.12  | 0.06  | 1.35  | 0.53   | 1.37   | 0.51  | 1.83   |
| Quercetin-3-O-rhamnoside             | 0.63     | 1.62  | 0.48  | 2.72  | 2.67  | 4.09   | 1.03  | 1.77  | 1.64  | 0.45  | 0.51  | 3.18   | 0.60   | 0.79  | 2.13   |
| Isorhamnetin-3-O-glucoside           | 1.63     | 0.08  | 0.04  | 0.06  | 0.02  | 0.05   | 0.02  | 0.02  | 1.68  | 1.67  | 1.69  | 1.85   | 1.83   | 1.81  | 1.84   |
| Kaempferol                           | 0.53     | 0.54  | 0.56  | 0.54  | 0.55  | 0.55   | 0.55  | 0.55  | 0.55  | 0.55  | 0.55  | 0.55   | 0.55   | 0.55  | 0.54   |
| Naringenin                           | 0.54     | 0.55  | 0.57  | 0.55  | 0.56  | 0.56   | 0.56  | 0.56  | 0.56  | 0.56  | 0.56  | 0.56   | 0.56   | 0.56  | 0.55   |
| Protocatechuic acid                  | 0.58     | 0.59  | 0.60  | 0.59  | 0.60  | 0.60   | 0.60  | 0.59  | 0.59  | 0.59  | 0.60  | 0.59   | 0.60   | 0.60  | 0.59   |
| <i>p</i> -Hydroxybenzoic acid        | 0.38     | 0.39  | 0.40  | 0.38  | 0.39  | 0.39   | 0.39  | 0.39  | 0.39  | 0.39  | 0.39  | 0.39   | 0.40   | 0.39  | 0.39   |
| Catechin                             | 6.37     | 35.67 | 6.04  | 8.84  | 2.68  | 14.80  | 4.84  | 0.70  | 3.33  | 7.11  | 6.14  | 40.79  | 7.63   | 11.69 | 14.90  |
| <i>p</i> -Coumaric acid              | 0.01     | 0.05  | 0.07  | 0.02  | 0.00  | 0.00   | 0.02  | 0.00  | 0.00  | 0.00  | 0.03  | 0.04   | 0.07   | 0.04  | 0.21   |
| Isorhamnetin-3-O-rutinoside          | 0.45     | 0.46  | 0.47  | 0.46  | 0.47  | 0.47   | 0.47  | 0.47  | 0.47  | 0.47  | 0.47  | 0.47   | 0.47   | 0.47  | 0.46   |
| Ferulic acid                         | 0.65     | 0.01  | 0.68  | 0.67  | 0.68  | 0.02   | 0.68  | 0.02  | 0.02  | 0.67  | 0.02  | 0.04   | 0.02   | 0.02  | 0.04   |
| Kaempferol-7-O-glucoside             | 0.56     | 0.45  | 0.28  | 0.26  | 0.27  | 0.52   | 0.19  | 0.83  | 0.20  | 0.16  | 0.32  | 0.53   | 0.33   | 0.77  | 0.52   |
| Apigenin                             | 0.39     | 0.40  | 0.41  | 0.40  | 0.41  | 0.41   | 0.41  | 0.40  | 0.40  | 0.40  | 0.41  | 0.40   | 0.41   | 0.41  | 0.40   |
| Luteolin                             | 0.32     | 0.33  | 0.34  | 0.33  | 0.33  | 0.33   | 0.33  | 0.33  | 0.33  | 0.33  | 0.33  | 0.33   | 0.34   | 0.33  | 0.33   |
| Eriodictyol                          | 0.58     | 0.59  | 0.61  | 0.59  | 0.60  | 0.60   | 0.60  | 0.60  | 0.60  | 0.60  | 0.60  | 0.60   | 0.61   | 0.60  | 0.59   |
| Gallic acid                          | 0.47     | 0.48  | 0.49  | 0.48  | 0.48  | 0.49   | 0.48  | 0.48  | 0.48  | 0.48  | 0.49  | 0.48   | 0.49   | 0.49  | 0.48   |
| Naringin                             | 0.36     | 0.37  | 0.38  | 0.37  | 0.38  | 0.38   | 0.38  | 0.37  | 0.37  | 0.37  | 0.38  | 0.37   | 0.38   | 0.38  | 0.37   |

1 – refer to the table 4. in article (as a list of collected cultivars).

2 – S- standard, R- resistant, A- autocthtonous type of cultivar.

3 – expressed in g/kg equavilents gallic acid.

4 – expressed in mmol/kg trollox equavilents.

5 – expressed in mg/kg (all individual compounds presented in the table).

Table S1. Continued

| Tissue<br>Year                                | Mesocarp<br>2018             |        |        |        |        |        |        |       |        |        |        |        |        |        |        |    |
|-----------------------------------------------|------------------------------|--------|--------|--------|--------|--------|--------|-------|--------|--------|--------|--------|--------|--------|--------|----|
|                                               | Cultivar number <sup>1</sup> | 16     | 17     | 18     | 19     | 20     | 21     | 22    | 23     | 24     | 25     | 26     | 27     | 28     | 29     | 30 |
| Type <sup>2</sup>                             | A                            | A      | A      | A      | A      | A      | A      | A     | A      | A      | A      | A      | A      | A      | A      | A  |
| TPC <sup>3</sup>                              | 0.83                         | 1.43   | 1.34   | 2.15   | 1.31   | 1.23   | 1.23   | 0.99  | 1.77   | 4.42   | 1.67   | 1.30   | 0.74   | 1.50   | 1.38   |    |
| RSA <sup>4</sup>                              | 10.25                        | 18.82  | 21.20  | 18.59  | 26.78  | 19.26  | 17.20  | 17.23 | 8.48   | 19.02  | 16.55  | 16.53  | 18.46  | 20.41  | 17.21  |    |
| 5- <i>O</i> -Caffeoylquinic acid <sup>5</sup> | 34.88                        | 196.92 | 163.34 | 130.34 | 191.04 | 170.71 | 187.21 | 82.67 | 103.51 | 212.18 | 185.19 | 132.68 | 135.58 | 144.25 | 148.55 |    |
| Caffeic acid                                  | 0.14                         | 0.75   | 0.65   | 0.49   | 0.67   | 0.67   | 0.63   | 0.31  | 0.37   | 0.72   | 0.67   | 0.49   | 0.46   | 0.51   | 0.48   |    |
| Phloretin                                     | 0.05                         | 0.14   | 0.11   | 0.12   | 0.08   | 0.09   | 0.07   | 0.06  | 0.07   | 0.11   | 0.06   | 0.10   | 0.06   | 0.07   | 0.05   |    |
| Phlorizin                                     | 1.76                         | 8.42   | 6.22   | 9.00   | 5.17   | 5.44   | 4.10   | 2.26  | 4.97   | 7.99   | 2.69   | 4.19   | 2.26   | 3.91   | 2.68   |    |
| Quercetin                                     | 0.16                         | 0.74   | 0.36   | 0.64   | 0.64   | 0.15   | 0.10   | 0.26  | 0.08   | 0.08   | 0.14   | 0.13   | 0.03   | 0.45   | 0.30   |    |
| Rutin                                         | 0.00                         | 0.60   | 0.04   | 0.02   | 0.00   | 0.01   | 0.00   | 0.03  | 0.05   | 0.31   | 0.02   | 0.00   | 0.00   | 0.16   | 0.04   |    |
| Quercetin-3- <i>O</i> -glucoside              | 0.56                         | 4.71   | 0.63   | 1.14   | 1.39   | 0.60   | 0.23   | 0.82  | 0.63   | 0.80   | 0.48   | 0.49   | 0.50   | 5.45   | 0.47   |    |
| Quercetin-3- <i>O</i> -rhamnoside             | 0.97                         | 1.15   | 0.38   | 5.19   | 2.74   | 0.19   | 1.39   | 3.20  | 0.31   | 0.80   | 1.47   | 0.17   | 0.78   | 3.75   | 1.61   |    |
| Isorhamnetin-3- <i>O</i> -glucoside           | 0.03                         | 1.65   | 1.69   | 0.03   | 0.12   | 1.71   | 0.04   | 0.01  | 1.56   | 1.66   | 1.70   | 0.02   | 0.02   | 0.02   | 1.68   |    |
| Kaempferol                                    | 0.56                         | 0.54   | 0.55   | 0.56   | 0.55   | 0.56   | 0.56   | 0.55  | 0.51   | 0.54   | 0.55   | 0.52   | 0.55   | 0.56   | 0.55   |    |
| Naringenin                                    | 0.57                         | 0.55   | 0.56   | 0.57   | 0.56   | 0.57   | 0.57   | 0.56  | 0.52   | 0.55   | 0.56   | 0.53   | 0.56   | 0.57   | 0.56   |    |
| Protocatechuic acid                           | 0.60                         | 0.59   | 0.60   | 0.61   | 0.60   | 0.61   | 0.61   | 0.60  | 0.55   | 0.59   | 0.60   | 0.57   | 0.60   | 0.60   | 0.60   |    |
| <i>p</i> -Hydroxybenzoic acid                 | 0.40                         | 0.38   | 0.39   | 0.40   | 0.39   | 0.40   | 0.40   | 0.39  | 0.36   | 0.39   | 0.39   | 0.37   | 0.39   | 0.40   | 0.39   |    |
| Catechin                                      | 7.23                         | 13.37  | 18.63  | 53.08  | 9.95   | 15.39  | 10.42  | 19.05 | 4.37   | 12.25  | 29.97  | 12.09  | 3.91   | 27.79  | 18.90  |    |
| <i>p</i> -Coumaric acid                       | 0.03                         | 0.10   | 0.11   | 0.35   | 0.15   | 0.07   | 0.09   | 0.09  | 0.06   | 0.08   | 0.03   | 0.07   | 0.08   | 0.04   | 0.05   |    |
| Isorhamnetin-3- <i>O</i> -rutinoside          | 0.48                         | 0.46   | 0.47   | 0.48   | 0.47   | 0.48   | 0.48   | 0.47  | 0.43   | 0.46   | 0.47   | 0.45   | 0.47   | 0.47   | 0.47   |    |
| Ferulic acid                                  | 0.69                         | 0.04   | 0.03   | 0.12   | 0.07   | 0.69   | 0.02   | 0.19  | 0.02   | 0.03   | 0.01   | 0.02   | 0.02   | 0.05   | 0.03   |    |
| Kaempferol-7- <i>O</i> -glucoside             | 0.87                         | 0.54   | 0.23   | 1.16   | 0.43   | 0.25   | 0.39   | 0.32  | 0.21   | 0.50   | 0.45   | 0.22   | 0.65   | 0.58   | 0.31   |    |
| Apigenin                                      | 0.41                         | 0.40   | 0.41   | 0.41   | 0.41   | 0.41   | 0.41   | 0.41  | 0.38   | 0.40   | 0.41   | 0.39   | 0.41   | 0.41   | 0.41   |    |
| Luteolin                                      | 0.34                         | 0.33   | 0.34   | 0.34   | 0.33   | 0.34   | 0.34   | 0.33  | 0.31   | 0.33   | 0.34   | 0.32   | 0.34   | 0.34   | 0.33   |    |
| Eriodictyol                                   | 0.61                         | 0.59   | 0.60   | 0.61   | 0.60   | 0.61   | 0.61   | 0.60  | 0.56   | 0.59   | 0.61   | 0.57   | 0.60   | 0.61   | 0.60   |    |
| Gallic acid                                   | 0.49                         | 0.48   | 0.49   | 0.49   | 0.49   | 0.49   | 0.49   | 0.49  | 0.45   | 0.48   | 0.49   | 0.46   | 0.49   | 0.49   | 0.48   |    |
| Naringin                                      | 0.38                         | 0.37   | 0.38   | 0.38   | 0.38   | 0.38   | 0.38   | 0.38  | 0.35   | 0.37   | 0.38   | 0.36   | 0.38   | 0.38   | 0.38   |    |

1 – refer to the table 4. in article (as a list of collected cultivars).

2 – S- standard, R- resistant, A- autocthonous type of cultivar.

3 – expressed in g/kg equavilents gallic acid.

4 – expressed in mmol/kg trollox equavilents.

5 – expressed in mg/kg (all individual compounds presented in the table).

Table S1. Continued

| Tissue<br>Year                                | Mesocarp<br>2019 |      |      |      |      |      |      |       |      |      |      |       |       |      |       |
|-----------------------------------------------|------------------|------|------|------|------|------|------|-------|------|------|------|-------|-------|------|-------|
|                                               | 1                | 2    | 3    | 4    | 5    | 6    | 7    | 8     | 9    | 10   | 11   | 12    | 13    | 14   | 15    |
| Cultivar number <sup>1</sup>                  |                  |      |      |      |      |      |      |       |      |      |      |       |       |      |       |
| Type <sup>2</sup>                             | S                | S    | S    | S    | S    | R    | R    | R     | R    | R    | R    | A     | A     | A    | A     |
| TPC <sup>3</sup>                              | 0.51             | 0.73 | 0.59 | 0.42 | 0.22 | 0.11 | 0.12 | 0.14  | 1.61 | 0.70 | 0.31 | 1.96  | 2.59  | 0.88 | 2.15  |
| RSA <sup>4</sup>                              | 9.28             | 9.44 | 9.02 | 7.79 | 9.64 | 9.58 | 7.75 | 8.04  | 8.79 | 8.28 | 7.91 | 9.31  | 9.17  | 9.37 | 10.17 |
| 5- <i>O</i> -Caffeoylquinic acid <sup>5</sup> | 1.86             | 3.23 | 6.46 | 4.05 | 5.54 | 3.55 | 2.77 | 10.72 | 5.91 | 8.43 | 0.48 | 18.82 | 15.66 | 7.22 | 41.99 |
| Caffeic acid                                  | 1.02             | 1.02 | 1.01 | 0.99 | 1.04 | 1.00 | 0.97 | 0.95  | 1.01 | 0.99 | 0.93 | 0.91  | 1.01  | 1.00 | 0.98  |
| Phloretin                                     | 0.04             | 0.05 | 0.06 | 0.06 | 0.04 | 0.06 | 0.04 | 0.09  | 0.05 | 0.04 | 0.04 | 0.07  | 0.17  | 0.07 | 0.15  |
| Phlorizin                                     | 0.87             | 0.62 | 0.91 | 0.96 | 0.55 | 0.39 | 0.22 | 1.14  | 0.55 | 0.43 | 0.11 | 1.06  | 2.40  | 2.28 | 4.40  |
| Quercetin                                     | 1.76             | 1.75 | 1.74 | 1.70 | 1.79 | 1.73 | 1.67 | 1.63  | 1.74 | 1.71 | 1.60 | 1.57  | 1.73  | 1.72 | 1.69  |
| Rutin                                         | 0.03             | 0.05 | 0.07 | 0.08 | 0.07 | 0.03 | 0.04 | 0.04  | 0.07 | 0.04 | 0.03 | 0.05  | 0.10  | 0.04 | 0.14  |
| Quercetin-3- <i>O</i> -glucoside              | 0.19             | 0.22 | 0.36 | 0.37 | 0.94 | 0.17 | 0.18 | 0.24  | 0.24 | 0.23 | 0.18 | 0.36  | 0.53  | 0.23 | 0.37  |
| Quercetin-3- <i>O</i> -rhamnoside             | 0.28             | 0.45 | 0.17 | 1.14 | 1.02 | 0.26 | 0.26 | 0.29  | 0.68 | 0.18 | 0.13 | 1.04  | 0.10  | 0.29 | 0.12  |
| Isorhamnetin-3- <i>O</i> -glucoside           | 0.02             | 0.02 | 0.01 | 0.08 | 0.05 | 0.01 | 0.02 | 0.01  | 0.01 | 0.00 | 0.01 | 0.06  | 0.10  | 0.07 | 0.04  |
| Kaempferol                                    | 1.07             | 1.06 | 1.05 | 1.03 | 1.08 | 1.04 | 1.01 | 0.99  | 1.05 | 1.03 | 0.97 | 0.95  | 1.05  | 1.04 | 1.02  |
| Naringenin                                    | 1.09             | 1.08 | 1.07 | 1.05 | 1.10 | 1.06 | 1.03 | 1.01  | 1.07 | 1.05 | 0.98 | 0.96  | 1.07  | 1.06 | 1.04  |
| Protocatechuic acid                           | 1.16             | 1.15 | 1.14 | 1.12 | 1.18 | 1.13 | 1.10 | 1.07  | 1.14 | 1.12 | 1.05 | 1.03  | 1.14  | 1.13 | 1.11  |
| <i>p</i> -Hydroxybenzoic acid                 | 0.76             | 0.76 | 0.75 | 0.73 | 0.77 | 0.74 | 0.72 | 0.70  | 0.75 | 0.74 | 0.69 | 0.67  | 0.75  | 0.74 | 0.73  |
| Catechin                                      | 1.40             | 1.39 | 1.38 | 1.35 | 1.42 | 1.37 | 1.33 | 1.30  | 1.38 | 1.36 | 1.27 | 1.25  | 1.38  | 1.37 | 1.34  |
| <i>p</i> -Coumaric acid                       | 0.34             | 0.34 | 0.33 | 0.33 | 0.34 | 0.33 | 0.32 | 0.31  | 0.33 | 0.33 | 0.31 | 0.30  | 0.33  | 0.33 | 0.32  |
| Isorhamnetin-3- <i>O</i> -rutinoside          | 0.91             | 0.91 | 0.90 | 0.88 | 0.92 | 0.89 | 0.86 | 0.84  | 0.90 | 0.88 | 0.83 | 0.81  | 0.90  | 0.89 | 0.87  |
| Ferulic acid                                  | 1.31             | 1.31 | 1.29 | 1.27 | 1.33 | 1.29 | 1.25 | 1.22  | 1.30 | 1.27 | 1.19 | 1.17  | 1.29  | 1.29 | 1.26  |
| Kaempferol-7- <i>O</i> -glucoside             | 1.26             | 1.25 | 1.24 | 1.21 | 1.28 | 1.23 | 1.19 | 1.17  | 1.24 | 1.22 | 1.14 | 1.12  | 1.24  | 1.23 | 1.20  |
| Apigenin                                      | 0.79             | 0.78 | 0.78 | 0.76 | 0.80 | 0.77 | 0.75 | 0.73  | 0.78 | 0.76 | 0.72 | 0.70  | 0.78  | 0.77 | 0.75  |
| Luteolin                                      | 0.65             | 0.64 | 0.64 | 0.62 | 0.66 | 0.63 | 0.61 | 0.60  | 0.64 | 0.63 | 0.59 | 0.57  | 0.64  | 0.63 | 0.62  |
| Eriodictyol                                   | 1.17             | 1.16 | 1.15 | 1.12 | 1.18 | 1.14 | 1.10 | 1.08  | 1.15 | 1.13 | 1.06 | 1.03  | 1.14  | 1.14 | 1.11  |
| Gallic acid                                   | 0.94             | 0.94 | 0.93 | 0.91 | 0.96 | 0.92 | 0.89 | 0.87  | 0.93 | 0.91 | 0.85 | 0.84  | 0.93  | 0.92 | 0.90  |
| Naringin                                      | 0.02             | 0.22 | 0.29 | 0.12 | 0.23 | 0.03 | 0.05 | 0.14  | 0.13 | 0.14 | 0.04 | 0.89  | 1.14  | 0.08 | 0.38  |

1 – refer to the table 4. in article (as a list of collected cultivars).

2 – S- standard, R- resistant, A- autocthonous type of cultivar.

3 – expressed in g/kg equavilents gallic acid.

4 – expressed in mmol/kg trollox equavilents.

5 – expressed in mg/kg (all individual compounds presented in the table).

Table S1. Continued

| Tissue                                        | Mesocarp |       |       |       |       |       |       |       |       |       |       |       |       |       |       |                 |
|-----------------------------------------------|----------|-------|-------|-------|-------|-------|-------|-------|-------|-------|-------|-------|-------|-------|-------|-----------------|
| Year                                          | 2019     |       |       |       |       |       |       |       |       |       |       |       |       |       |       |                 |
| Cultivar number                               | 16       | 17    | 18    | 19    | 20    | 21    | 22    | 23    | 24    | 25    | 26    | 27    | 28    | 29    | 30    | 31 <sup>6</sup> |
| Type                                          | A        | A     | A     | A     | A     | A     | A     | A     | A     | A     | A     | A     | A     | A     | A     | A               |
| TPC                                           | 1.30     | 1.01  | 0.97  | 1.85  | 1.44  | 0.81  | 1.40  | 1.53  | 1.77  | 1.57  | 1.19  | 1.57  | 1.17  | 2.17  | 1.98  | 1.07            |
| RSA                                           | 10.97    | 10.17 | 11.91 | 9.50  | 10.42 | 8.62  | 8.13  | 9.52  | 9.22  | 6.54  | 9.36  | 6.03  | 9.95  | 10.41 | 11.42 | 8.81            |
| 5- <i>O</i> -Caffeoylquinic acid <sup>5</sup> | 10.31    | 14.90 | 7.78  | 16.94 | 20.66 | 11.09 | 30.62 | 21.07 | 30.06 | 25.70 | 17.83 | 23.66 | 28.50 | 22.10 | 24.39 | 17.80           |
| Caffeic acid                                  | 1.04     | 1.00  | 0.98  | 0.97  | 1.02  | 0.99  | 0.93  | 0.94  | 0.97  | 1.01  | 0.97  | 1.00  | 0.95  | 0.97  | 1.03  | 1.01            |
| Phloretin                                     | 0.20     | 0.17  | 0.08  | 0.23  | 0.09  | 0.11  | 0.12  | 0.09  | 0.21  | 0.24  | 0.10  | 0.22  | 0.08  | 0.15  | 0.26  | 0.10            |
| Phlorizin                                     | 3.99     | 2.19  | 1.32  | 3.65  | 1.50  | 1.90  | 2.67  | 1.58  | 3.70  | 5.93  | 1.54  | 3.59  | 1.36  | 1.65  | 5.11  | 1.65            |
| Quercetin                                     | 1.79     | 1.73  | 1.69  | 1.67  | 1.75  | 1.71  | 1.61  | 1.62  | 1.67  | 1.73  | 1.67  | 1.73  | 1.64  | 1.66  | 1.77  | 1.74            |
| Rutin                                         | 0.06     | 0.05  | 0.05  | 0.11  | 0.03  | 0.05  | 0.05  | 0.06  | 0.12  | 0.03  | 0.23  | 0.08  | 0.05  | 0.04  | 0.06  | 0.11            |
| Quercetin-3- <i>O</i> -glucoside              | 0.37     | 0.37  | 0.58  | 1.02  | 0.31  | 0.40  | 0.49  | 0.60  | 0.61  | 0.21  | 1.01  | 0.70  | 0.30  | 0.22  | 0.34  | 0.56            |
| Quercetin-3- <i>O</i> -rhamnoside             | 0.36     | 0.08  | 0.68  | 1.04  | 0.67  | 0.05  | 0.57  | 0.63  | 0.10  | 0.13  | 0.55  | 0.07  | 0.31  | 0.23  | 0.66  | 0.34            |
| Isorhamnetin-3- <i>O</i> -glucoside           | 0.06     | 0.05  | 0.04  | 0.08  | 0.03  | 0.06  | 0.04  | 0.06  | 0.04  | 0.05  | 0.08  | 0.04  | 0.02  | 0.00  | 0.03  | 0.04            |
| Kaempferol                                    | 1.08     | 1.04  | 1.02  | 1.01  | 1.06  | 1.03  | 0.97  | 0.98  | 1.01  | 1.05  | 1.01  | 1.04  | 0.99  | 1.01  | 1.07  | 1.05            |
| Naringenin                                    | 1.10     | 1.06  | 1.04  | 1.03  | 1.08  | 1.05  | 0.99  | 1.00  | 1.03  | 1.07  | 1.03  | 1.06  | 1.01  | 1.02  | 1.09  | 1.07            |
| Protocatechuic acid                           | 1.18     | 1.13  | 1.11  | 1.10  | 1.15  | 1.12  | 1.06  | 1.06  | 1.09  | 1.14  | 1.10  | 1.13  | 1.07  | 1.09  | 1.16  | 1.14            |
| <i>p</i> -Hydroxybenzoic acid                 | 0.77     | 0.74  | 0.73  | 0.72  | 0.75  | 0.74  | 0.69  | 0.70  | 0.72  | 0.75  | 0.72  | 0.74  | 0.70  | 0.72  | 0.76  | 0.75            |
| Catechin                                      | 1.43     | 1.37  | 1.34  | 1.33  | 1.39  | 1.36  | 1.28  | 1.29  | 1.32  | 1.38  | 1.33  | 1.37  | 1.30  | 1.32  | 1.40  | 1.39            |
| <i>p</i> -Coumaric acid                       | 0.34     | 0.33  | 0.32  | 0.32  | 0.34  | 0.33  | 0.31  | 0.31  | 0.32  | 0.33  | 0.32  | 0.33  | 0.31  | 0.32  | 0.34  | 0.33            |
| Isorhamnetin-3- <i>O</i> -rutinoside          | 0.93     | 0.89  | 0.87  | 0.86  | 0.90  | 0.88  | 0.83  | 0.84  | 0.86  | 0.89  | 0.86  | 0.89  | 0.85  | 0.86  | 0.91  | 0.90            |
| Ferulic acid                                  | 1.34     | 1.29  | 1.26  | 1.25  | 1.31  | 1.27  | 1.20  | 1.21  | 1.24  | 1.29  | 1.24  | 1.29  | 1.22  | 1.24  | 1.32  | 1.30            |
| Kaempferol-7- <i>O</i> -glucoside             | 1.28     | 1.23  | 1.20  | 1.19  | 1.25  | 1.22  | 1.15  | 1.15  | 1.19  | 1.24  | 1.19  | 1.23  | 1.17  | 1.19  | 1.26  | 1.24            |
| Apigenin                                      | 0.80     | 0.77  | 0.76  | 0.75  | 0.78  | 0.76  | 0.72  | 0.72  | 0.75  | 0.77  | 0.75  | 0.77  | 0.73  | 0.74  | 0.79  | 0.78            |
| Luteolin                                      | 0.66     | 0.63  | 0.62  | 0.61  | 0.64  | 0.63  | 0.59  | 0.59  | 0.61  | 0.64  | 0.61  | 0.63  | 0.60  | 0.61  | 0.65  | 0.64            |
| Eriodictyol                                   | 1.18     | 1.14  | 1.12  | 1.10  | 1.16  | 1.13  | 1.06  | 1.07  | 1.10  | 1.14  | 1.10  | 1.14  | 1.08  | 1.10  | 1.17  | 1.15            |
| Gallic acid                                   | 0.96     | 0.92  | 0.90  | 0.89  | 0.93  | 0.91  | 0.86  | 0.86  | 0.89  | 0.92  | 0.89  | 0.92  | 0.87  | 0.89  | 0.94  | 0.93            |
| Naringin                                      | 0.16     | 1.02  | 0.20  | 0.88  | 0.87  | 0.80  | 0.88  | 0.64  | 1.86  | 0.49  | 0.24  | 1.57  | 0.61  | 0.60  | 1.53  | 0.17            |

1 – refer to the table 4. in article (as a list of collected cultivars).

2 – S- standard, R- resistant, A- autocthonous type of cultivar.

3 – expressed in g/kg equavilents gallic acid.

4 – expressed in mmol/kg trollox equavilents.

5 – expressed in mg/kg (all individual compounds presented in the table).

6 – sample unavvaible in 2018.

Table S1. Continued

| Tissue<br>Year                                | Peel<br>2018 |       |       |       |       |        |       |       |       |       |       |       |        |       |        |
|-----------------------------------------------|--------------|-------|-------|-------|-------|--------|-------|-------|-------|-------|-------|-------|--------|-------|--------|
| Cultivar number <sup>1</sup>                  | 1            | 2     | 3     | 4     | 5     | 6      | 7     | 8     | 9     | 10    | 11    | 12    | 13     | 14    | 15     |
| Type <sup>2</sup>                             | S            | S     | S     | S     | S     | R      | R     | R     | R     | R     | R     | A     | A      | A     | A      |
| TPC <sup>3</sup>                              | 3.67         | 5.31  | 6.51  | 3.43  | 4.55  | 5.44   | 4.52  | 3.55  | 3.30  | 3.13  | 3.50  | 7.71  | 6.78   | 7.52  | 6.70   |
| RSA <sup>4</sup>                              | 50.75        | 57.64 | 42.08 | 29.34 | 36.35 | 61.21  | 33.25 | 30.81 | 54.82 | 26.28 | 31.12 | 49.35 | 40.93  | 43.19 | 41.46  |
| 5- <i>O</i> -Caffeoylquinic acid <sup>5</sup> | 4.55         | 7.58  | 85.52 | 63.33 | 12.64 | 206.53 | 49.84 | 11.99 | 25.73 | 12.46 | 3.81  | 80.99 | 312.00 | 24.77 | 557.46 |
| Caffeic acid                                  | 0.03         | 0.05  | 0.34  | 0.26  | 0.08  | 0.83   | 0.24  | 0.06  | 0.13  | 0.07  | 0.05  | 0.33  | 1.30   | 0.15  | 1.69   |
| Phloretin                                     | 0.14         | 0.07  | 0.16  | 0.17  | 0.20  | 0.17   | 0.14  | 0.07  | 0.05  | 0.11  | 0.14  | 0.37  | 1.25   | 0.61  | 1.00   |
| Phlorizin                                     | 20.66        | 6.10  | 23.09 | 19.18 | 10.52 | 13.77  | 12.14 | 3.95  | 4.03  | 4.05  | 4.99  | 31.99 | 42.85  | 38.31 | 30.21  |
| Quercetin                                     | 28.22        | 21.00 | 30.59 | 27.83 | 28.62 | 33.74  | 25.60 | 20.44 | 9.53  | 19.42 | 15.91 | 31.67 | 33.07  | 45.77 | 20.18  |
| Rutin                                         | 2.20         | 13.41 | 3.26  | 5.01  | 1.87  | 5.59   | 3.12  | 3.67  | 3.24  | 5.70  | 1.28  | 2.55  | 9.41   | 4.43  | 11.96  |
| Quercetin-3- <i>O</i> -glucoside              | 49.12        | 62.71 | 57.45 | 53.31 | 34.87 | 55.39  | 48.39 | 45.36 | 35.21 | 41.72 | 24.24 | 45.43 | 45.11  | 54.00 | 32.31  |
| Quercetin-3- <i>O</i> -rhamnoside             | 25.63        | 38.94 | 27.15 | 26.00 | 29.40 | 67.68  | 23.90 | 48.94 | 47.49 | 42.03 | 6.71  | 22.66 | 16.99  | 24.11 | 17.79  |
| Isorhamnetin-3- <i>O</i> -glucoside           | 0.65         | 0.66  | 3.27  | 0.21  | 1.03  | 2.24   | 0.28  | 1.47  | 0.06  | 0.14  | 0.04  | 4.55  | 0.08   | 1.51  | 0.08   |
| Kaempferol                                    | 0.23         | 0.15  | 0.12  | 0.24  | 0.23  | 0.72   | 0.19  | 0.30  | 0.15  | 0.35  | 0.14  | 0.23  | 0.42   | 0.67  | 0.41   |
| Naringenin                                    | 0.06         | 0.04  | 0.08  | 0.06  | 0.12  | 0.08   | 0.06  | 0.09  | 0.02  | 0.04  | 0.57  | 0.14  | 0.08   | 0.56  | 0.06   |
| Protocatechuic acid                           | 0.51         | 0.51  | 0.86  | 0.52  | 0.57  | 1.01   | 0.68  | 0.92  | 0.57  | 0.54  | 0.97  | 0.57  | 0.65   | 0.71  | 0.99   |
| <i>p</i> -Hydroxybenzoic acid                 | 0.07         | 0.11  | 0.10  | 0.07  | 0.20  | 0.05   | 0.08  | 0.15  | 0.08  | 0.15  | 0.13  | 0.09  | 0.12   | 0.16  | 0.30   |
| Catechin                                      | 28.26        | 33.26 | 41.53 | 24.10 | 21.31 | 35.51  | 43.72 | 6.79  | 15.69 | 16.18 | 21.42 | 74.61 | 59.42  | 50.27 | 30.25  |
| <i>p</i> -Coumaric acid                       | 0.04         | 0.05  | 0.09  | 0.05  | 0.06  | 0.17   | 0.07  | 0.05  | 0.05  | 0.07  | 0.08  | 0.05  | 0.34   | 0.06  | 0.69   |
| Isorhamnetin-3- <i>O</i> -rutinoside          | 0.22         | 0.15  | 0.39  | 0.07  | 0.28  | 0.94   | 0.10  | 0.50  | 1.10  | 0.13  | 0.02  | 0.65  | 0.47   | 0.22  | 0.48   |
| Ferulic acid                                  | 0.69         | 0.05  | 0.03  | 0.67  | 0.02  | 0.05   | 0.05  | 0.06  | 0.03  | 0.03  | 0.05  | 0.03  | 0.21   | 0.03  | 0.25   |
| Kaempferol-7- <i>O</i> -glucoside             | 6.06         | 2.73  | 0.66  | 3.27  | 0.66  | 0.65   | 2.28  | 0.65  | 3.22  | 5.53  | 1.97  | 0.66  | 2.13   | 0.64  | 4.66   |
| Apigenin                                      | 0.41         | 0.40  | 0.41  | 0.40  | 0.41  | 0.41   | 0.41  | 0.41  | 0.95  | 0.41  | 0.42  | 0.41  | 0.41   | 0.40  | 0.41   |
| Luteolin                                      | 0.34         | 0.33  | 0.34  | 0.33  | 0.34  | 0.33   | 0.34  | 0.33  | 0.78  | 0.33  | 0.34  | 0.34  | 0.34   | 0.33  | 0.34   |
| Eriodictyol                                   | 0.61         | 0.59  | 0.61  | 0.59  | 0.61  | 0.60   | 0.61  | 0.60  | 1.40  | 0.60  | 0.62  | 0.61  | 0.60   | 0.60  | 0.61   |
| Gallic acid                                   | 0.49         | 0.48  | 0.49  | 0.48  | 0.49  | 0.48   | 0.49  | 0.49  | 1.13  | 0.49  | 0.50  | 0.49  | 0.49   | 0.48  | 0.49   |
| Naringin                                      | 0.38         | 0.37  | 0.38  | 0.37  | 0.38  | 0.38   | 0.38  | 0.38  | 0.88  | 0.38  | 0.39  | 0.38  | 0.38   | 0.37  | 0.38   |

1 – refer to the table 4. in article (as a list of collected cultivars).

2 – S- standard, R- resistant, A- autocthtonous type of cultivar.

3 – expressed in g/kg equavilents gallic acid.

4 – expressed in mmol/kg trollox equavilents.

5 – expressed in mg/kg (all individual compounds presented in the table).

Table S1. Continued

| Tissue<br>Year                                | Peel<br>2018 |        |        |        |        |        |        |       |        |        |        |        |        |        |        |
|-----------------------------------------------|--------------|--------|--------|--------|--------|--------|--------|-------|--------|--------|--------|--------|--------|--------|--------|
| Cultivar number <sup>1</sup>                  | 16           | 17     | 18     | 19     | 20     | 21     | 22     | 23    | 24     | 25     | 26     | 27     | 28     | 29     | 30     |
| Type <sup>2</sup>                             | A            | A      | A      | A      | A      | A      | A      | A     | A      | A      | A      | A      | A      | A      | A      |
| TPC <sup>3</sup>                              | 6.60         | 6.40   | 5.70   | 8.54   | 7.53   | 7.52   | 4.87   | 4.35  | 5.07   | 8.42   | 7.57   | 7.91   | 5.41   | 8.59   | 9.26   |
| RSA <sup>4</sup>                              | 40.85        | 41.45  | 37.08  | 44.13  | 45.61  | 39.48  | 39.21  | 29.51 | 34.16  | 45.64  | 45.86  | 40.38  | 36.07  | 48.44  | 45.71  |
| 5- <i>O</i> -Caffeoylquinic acid <sup>5</sup> | 36.15        | 428.67 | 430.92 | 93.81  | 503.12 | 214.73 | 224.67 | 96.40 | 326.37 | 269.85 | 257.52 | 227.26 | 235.77 | 272.71 | 312.87 |
| Caffeic acid                                  | 0.12         | 1.52   | 1.64   | 1.05   | 1.71   | 0.80   | 0.89   | 0.49  | 1.35   | 0.84   | 1.19   | 0.79   | 0.78   | 0.81   | 1.29   |
| Phloretin                                     | 0.68         | 1.26   | 1.21   | 0.92   | 0.38   | 0.48   | 0.18   | 0.21  | 0.48   | 0.35   | 0.12   | 0.77   | 0.27   | 0.53   | 0.15   |
| Phlorizin                                     | 25.77        | 38.95  | 35.58  | 35.46  | 17.95  | 44.66  | 17.54  | 14.76 | 43.69  | 54.25  | 12.72  | 59.04  | 25.24  | 32.52  | 13.25  |
| Quercetin                                     | 39.11        | 38.04  | 22.12  | 16.99  | 24.70  | 27.77  | 9.78   | 17.74 | 21.94  | 19.30  | 16.34  | 20.71  | 18.61  | 38.18  | 14.24  |
| Rutin                                         | 5.98         | 19.70  | 3.87   | 1.71   | 1.26   | 23.24  | 0.45   | 4.30  | 9.92   | 20.62  | 8.12   | 6.52   | 0.67   | 6.29   | 6.09   |
| Quercetin-3- <i>O</i> -glucoside              | 42.68        | 43.15  | 19.86  | 15.52  | 23.53  | 71.81  | 9.18   | 37.66 | 41.80  | 75.25  | 37.63  | 45.05  | 30.44  | 50.68  | 27.02  |
| Quercetin-3- <i>O</i> -rhamnoside             | 20.46        | 15.32  | 8.50   | 14.00  | 18.80  | 23.20  | 9.09   | 20.87 | 15.38  | 27.26  | 16.00  | 18.84  | 19.12  | 25.26  | 13.00  |
| Isorhamnetin-3- <i>O</i> -glucoside           | 2.18         | 0.18   | 0.06   | 0.04   | 1.94   | 0.28   | 2.12   | 0.09  | 0.17   | 0.24   | 0.25   | 0.18   | 2.41   | 0.24   | 0.14   |
| Kaempferol                                    | 0.61         | 0.59   | 0.17   | 0.55   | 0.34   | 0.17   | 0.02   | 0.11  | 0.30   | 0.48   | 0.22   | 0.11   | 0.09   | 0.39   | 0.15   |
| Naringenin                                    | 0.57         | 0.11   | 0.05   | 0.06   | 0.09   | 0.04   | 0.04   | 0.04  | 0.06   | 0.07   | 0.03   | 0.04   | 0.12   | 0.14   | 0.03   |
| Protocatechuic acid                           | 0.89         | 0.66   | 0.53   | 0.51   | 0.62   | 0.80   | 0.43   | 0.51  | 0.55   | 0.85   | 0.52   | 0.76   | 1.07   | 0.60   | 0.59   |
| <i>p</i> -Hydroxybenzoic acid                 | 0.17         | 0.13   | 0.08   | 0.18   | 0.22   | 0.28   | 0.07   | 0.07  | 0.07   | 0.32   | 0.10   | 0.35   | 0.17   | 0.07   | 0.11   |
| Catechin                                      | 31.55        | 32.30  | 56.05  | 136.11 | 58.32  | 49.52  | 29.85  | 77.83 | 37.78  | 43.97  | 57.66  | 56.56  | 34.24  | 88.20  | 58.57  |
| <i>p</i> -Coumaric acid                       | 0.04         | 0.30   | 0.51   | 1.50   | 0.40   | 0.18   | 0.23   | 0.39  | 0.33   | 0.09   | 0.28   | 0.24   | 0.18   | 0.08   | 0.35   |
| Isorhamnetin-3- <i>O</i> -rutinoside          | 0.65         | 0.48   | 0.47   | 0.48   | 0.31   | 0.46   | 0.26   | 0.05  | 0.47   | 0.49   | 0.12   | 0.13   | 0.21   | 0.47   | 0.07   |
| Ferulic acid                                  | 0.69         | 0.22   | 0.44   | 0.48   | 0.18   | 0.09   | 0.09   | 0.52  | 0.33   | 0.03   | 0.47   | 0.11   | 0.04   | 0.06   | 0.27   |
| Kaempferol-7- <i>O</i> -glucoside             | 12.21        | 3.93   | 1.42   | 1.87   | 0.65   | 3.08   | 0.66   | 1.43  | 2.55   | 7.45   | 2.68   | 2.30   | 0.66   | 3.52   | 2.76   |
| Apigenin                                      | 0.41         | 0.41   | 0.41   | 0.41   | 0.41   | 0.40   | 0.41   | 0.41  | 0.41   | 0.42   | 0.41   | 0.41   | 0.41   | 0.41   | 0.41   |
| Luteolin                                      | 0.34         | 0.34   | 0.34   | 0.34   | 0.34   | 0.33   | 0.34   | 0.34  | 0.33   | 0.35   | 0.34   | 0.34   | 0.34   | 0.34   | 0.34   |
| Eriodictyol                                   | 0.61         | 0.61   | 0.61   | 0.61   | 0.61   | 0.59   | 0.61   | 0.61  | 0.60   | 0.62   | 0.61   | 0.61   | 0.61   | 0.61   | 0.61   |
| Gallic acid                                   | 0.49         | 0.49   | 0.49   | 0.49   | 0.49   | 0.48   | 0.49   | 0.49  | 0.49   | 0.50   | 0.49   | 0.49   | 0.49   | 0.49   | 0.49   |
| Naringin                                      | 0.38         | 0.38   | 0.38   | 0.38   | 0.38   | 0.37   | 0.38   | 0.38  | 0.38   | 0.39   | 0.38   | 0.38   | 0.38   | 0.38   | 0.38   |

1 – refer to the table 4. in article (as a list of collected cultivars).

2 – S- standard, R- resistant, A- autocthonous type of cultivar.

3 – expressed in g/kg equavilents gallic acid.

4 – expressed in mmol/kg trollox equavilents.

5 – expressed in mg/kg (all individual compounds presented in the table).

Table S1. Continued

| Tissue<br>Year                                | Peel<br>2019    |        |        |        |        |        |       |        |        |        |        |        |        |        |        |
|-----------------------------------------------|-----------------|--------|--------|--------|--------|--------|-------|--------|--------|--------|--------|--------|--------|--------|--------|
|                                               | Cultivar number | 1      | 2      | 3      | 4      | 5      | 6     | 7      | 8      | 9      | 10     | 11     | 12     | 13     | 14     |
| Type                                          | S               | S      | S      | S      | S      | R      | R     | R      | R      | R      | R      | A      | A      | A      | A      |
| TPC                                           | 21.52           | 24.89  | 16.11  | 9.70   | 37.33  | 11.66  | 7.64  | 15.47  | 18.37  | 20.66  | 10.49  | 22.26  | 25.88  | 22.01  | 23.42  |
| RSA                                           | 34.60           | 113.34 | 40.95  | 23.56  | 34.36  | 27.32  | 21.84 | 27.21  | 35.45  | 31.07  | 23.42  | 48.58  | 38.99  | 36.24  | 42.92  |
| 5- <i>O</i> -Caffeoylquinic acid <sup>5</sup> | 5.85            | 128.47 | 9.33   | 26.95  | 100.11 | 64.38  | 16.47 | 18.56  | 22.27  | 14.21  | 27.66  | 35.98  | 134.99 | 11.55  | 116.21 |
| Caffeic acid                                  | 0.07            | 0.22   | 0.26   | 0.13   | 0.60   | 0.36   | 0.08  | 0.18   | 0.43   | 0.22   | 0.33   | 0.29   | 0.97   | 0.08   | 0.77   |
| Phloretin                                     | 0.52            | 0.99   | 0.24   | 0.43   | 0.89   | 0.30   | 0.12  | 0.10   | 0.21   | 0.61   | 0.21   | 0.98   | 1.54   | 0.71   | 0.94   |
| Phlorizin                                     | 17.04           | 42.39  | 7.69   | 10.53  | 30.53  | 9.83   | 2.81  | 1.61   | 4.98   | 12.20  | 6.69   | 21.09  | 45.76  | 23.04  | 36.21  |
| Quercetin                                     | 57.01           | 20.41  | 37.10  | 32.51  | 27.76  | 20.67  | 14.02 | 41.46  | 44.78  | 92.04  | 18.54  | 70.28  | 30.64  | 51.53  | 55.63  |
| Rutin                                         | 32.12           | 61.76  | 33.55  | 21.88  | 16.61  | 12.07  | 6.57  | 50.33  | 47.27  | 36.25  | 23.94  | 35.26  | 46.62  | 40.95  | 229.97 |
| Quercetin-3- <i>O</i> -glucoside              | 160.14          | 115.36 | 153.66 | 123.16 | 158.20 | 104.07 | 69.73 | 229.18 | 158.33 | 231.86 | 116.11 | 164.90 | 123.63 | 163.25 | 244.14 |
| Quercetin-3- <i>O</i> -rhamnoside             | 41.50           | 20.41  | 39.47  | 38.08  | 49.81  | 115.14 | 26.45 | 142.32 | 122.90 | 80.39  | 75.90  | 40.80  | 24.56  | 53.05  | 72.10  |
| Isorhamnetin-3- <i>O</i> -glucoside           | 19.92           | 7.28   | 14.53  | 10.51  | 23.84  | 15.63  | 8.16  | 33.93  | 14.14  | 48.22  | 9.46   | 30.11  | 8.18   | 20.31  | 20.76  |
| Kaempferol                                    | 0.87            | 0.56   | 0.85   | 0.63   | 0.60   | 0.80   | 0.51  | 0.84   | 1.45   | 1.32   | 0.68   | 0.74   | 0.60   | 1.09   | 1.56   |
| Naringenin                                    | 0.21            | 0.33   | 0.14   | 0.13   | 0.19   | 0.11   | 0.05  | 0.15   | 0.08   | 0.24   | 0.10   | 0.29   | 0.28   | 0.45   | 0.19   |
| Protocatechuic acid                           | 1.49            | 1.39   | 1.40   | 1.45   | 1.49   | 1.50   | 1.47  | 1.45   | 1.49   | 1.50   | 1.42   | 1.50   | 1.51   | 1.49   | 1.49   |
| <i>p</i> -Hydroxybenzoic acid                 | 0.97            | 0.91   | 0.92   | 0.95   | 0.98   | 0.98   | 0.97  | 0.95   | 0.98   | 0.98   | 0.93   | 0.98   | 0.99   | 0.97   | 0.98   |
| Catechin                                      | 1.80            | 1.68   | 1.70   | 1.76   | 1.80   | 1.81   | 1.78  | 1.76   | 1.81   | 1.82   | 1.72   | 1.82   | 1.83   | 1.80   | 1.80   |
| <i>p</i> -Coumaric acid                       | 0.43            | 0.41   | 0.41   | 0.42   | 0.44   | 0.44   | 0.43  | 0.42   | 0.44   | 0.44   | 0.42   | 0.44   | 0.44   | 0.43   | 0.43   |
| Isorhamnetin-3- <i>O</i> -rutinoside          | 1.17            | 1.09   | 1.10   | 1.14   | 1.17   | 1.18   | 1.16  | 1.14   | 1.18   | 1.18   | 1.12   | 1.18   | 1.19   | 1.17   | 1.17   |
| Ferulic acid                                  | 1.69            | 1.58   | 1.59   | 1.65   | 1.69   | 1.70   | 1.67  | 1.65   | 1.70   | 1.70   | 1.61   | 1.70   | 1.71   | 1.69   | 1.69   |
| Kaempferol-7- <i>O</i> -glucoside             | 1.61            | 1.51   | 1.53   | 1.58   | 1.62   | 1.63   | 1.60  | 1.58   | 1.62   | 1.63   | 1.54   | 1.63   | 1.64   | 1.61   | 1.62   |
| Apigenin                                      | 0.07            | 0.13   | 0.08   | 0.05   | 1.02   | 0.05   | 0.02  | 0.08   | 0.05   | 0.11   | 0.97   | 0.11   | 0.03   | 0.20   | 0.03   |
| Luteolin                                      | 0.83            | 0.78   | 0.78   | 0.81   | 0.83   | 0.84   | 0.82  | 0.81   | 0.83   | 0.84   | 0.79   | 0.84   | 0.84   | 0.83   | 0.83   |
| Eriodictyol                                   | 0.10            | 0.06   | 0.06   | 0.09   | 0.10   | 0.04   | 0.03  | 0.09   | 0.12   | 0.14   | 0.05   | 0.14   | 0.06   | 0.11   | 0.06   |
| Gallic acid                                   | 1.21            | 1.13   | 1.14   | 1.18   | 1.21   | 1.22   | 1.20  | 1.18   | 1.21   | 1.22   | 1.16   | 1.22   | 1.23   | 1.21   | 1.21   |
| Naringin                                      | 1.09            | 11.85  | 2.29   | 2.03   | 5.62   | 1.99   | 1.12  | 0.16   | 1.59   | 4.17   | 1.39   | 6.94   | 11.61  | 1.57   | 2.72   |

1 – refer to the table 4. in article.

2 – S- standard, R- resistant, A- autocthtonous.

3 – expressed in g/kg equavilents gallic acid.

4 – expressed in mmol/kg trollox equavilents.

5 – expressed in mg/kg.



Table S1. Continued

| Tissue<br>Year                             | Peel<br>2019 |       |        |        |        |        |        |        |        |        |        |        |        |       |        |                 |
|--------------------------------------------|--------------|-------|--------|--------|--------|--------|--------|--------|--------|--------|--------|--------|--------|-------|--------|-----------------|
| Cultivar number                            | 16           | 17    | 18     | 19     | 20     | 21     | 22     | 23     | 24     | 25     | 26     | 27     | 28     | 29    | 30     | 31 <sup>6</sup> |
| Type                                       | A            | A     | A      | A      | A      | A      | A      | A      | A      | A      | A      | A      | A      | A     | A      | A               |
| <b>TPC</b>                                 | 24.69        | 22.57 | 18.46  | 28.78  | 41.62  | 20.47  | 24.95  | 25.26  | 27.77  | 21.16  | 28.66  | 21.47  | 28.70  | 10.61 | 24.33  | 15.24           |
| <b>RSA</b>                                 | 43.80        | 98.13 | 40.19  | 46.76  | 38.10  | 36.00  | 124.55 | 43.40  | 112.90 | 35.21  | 48.97  | 38.88  | 54.05  | 23.48 | 42.85  | 28.46           |
| <b>5-O-Caffeoylquinic acid<sup>5</sup></b> | 15.47        | 60.17 | 16.46  | 24.38  | 67.36  | 94.21  | 67.08  | 50.20  | 128.06 | 89.73  | 121.61 | 127.79 | 94.35  | 1.37  | 82.14  | 74.63           |
| <b>Caffeic acid</b>                        | 0.07         | 0.51  | 0.34   | 0.30   | 0.46   | 0.35   | 1.49   | 0.24   | 1.04   | 0.85   | 1.16   | 0.93   | 0.32   | 0.08  | 0.71   | 0.46            |
| <b>Phloretin</b>                           | 0.84         | 1.40  | 0.47   | 1.51   | 3.51   | 1.22   | 1.14   | 0.91   | 1.57   | 3.26   | 0.36   | 1.67   | 0.84   | 0.20  | 3.88   | 0.33            |
| <b>Phlorizin</b>                           | 32.37        | 31.89 | 10.74  | 36.77  | 52.88  | 35.48  | 25.63  | 25.75  | 44.95  | 40.00  | 11.82  | 25.01  | 34.31  | 1.22  | 45.84  | 10.16           |
| <b>Quercetin</b>                           | 54.33        | 18.04 | 92.90  | 19.48  | 112.09 | 18.70  | 53.51  | 47.06  | 26.16  | 18.84  | 73.30  | 27.22  | 34.85  | 13.39 | 41.72  | 12.17           |
| <b>Rutin</b>                               | 63.71        | 20.06 | 19.36  | 98.76  | 19.62  | 45.39  | 67.03  | 134.38 | 61.36  | 57.98  | 167.03 | 62.38  | 46.11  | 4.30  | 44.22  | 36.04           |
| <b>Quercetin-3-O-glucoside</b>             | 183.65       | 80.28 | 173.74 | 153.35 | 172.96 | 117.30 | 193.38 | 209.13 | 125.08 | 139.46 | 224.54 | 123.87 | 226.27 | 64.85 | 141.76 | 85.73           |
| <b>Quercetin-3-O-rhamnoside</b>            | 54.16        | 16.13 | 57.65  | 49.84  | 77.79  | 17.31  | 52.86  | 54.38  | 22.08  | 29.94  | 47.81  | 14.37  | 75.22  | 11.12 | 41.29  | 19.66           |
| <b>Isorhamnetin-3-O-glucoside</b>          | 22.63        | 4.86  | 18.82  | 11.77  | 44.99  | 6.58   | 74.46  | 17.20  | 7.77   | 11.34  | 19.38  | 7.17   | 36.32  | 7.51  | 13.77  | 7.39            |
| <b>Kaempferol</b>                          | 1.33         | 0.57  | 1.23   | 0.95   | 1.06   | 0.51   | 0.76   | 0.97   | 0.65   | 0.82   | 1.46   | 0.91   | 0.65   | 0.53  | 1.01   | 0.61            |
| <b>Naringenin</b>                          | 0.55         | 0.22  | 0.19   | 0.26   | 0.70   | 0.19   | 0.68   | 0.45   | 0.40   | 0.65   | 0.16   | 0.69   | 0.39   | 0.07  | 0.75   | 0.08            |
| <b>Protocatechuic acid</b>                 | 1.49         | 1.46  | 1.50   | 1.51   | 1.49   | 1.49   | 1.51   | 1.52   | 1.51   | 1.49   | 1.49   | 1.48   | 1.47   | 1.45  | 1.42   | 1.48            |
| <b>p-Hydroxybenzoic acid</b>               | 0.98         | 0.96  | 0.99   | 0.99   | 0.98   | 0.98   | 0.99   | 1.00   | 0.99   | 0.98   | 0.98   | 0.97   | 0.97   | 0.95  | 0.93   | 0.97            |
| <b>Catechin</b>                            | 1.81         | 1.77  | 1.82   | 1.83   | 1.80   | 1.81   | 1.82   | 1.84   | 1.83   | 1.81   | 1.81   | 1.79   | 1.78   | 1.75  | 1.72   | 1.79            |
| <b>p-Coumaric acid</b>                     | 0.44         | 0.43  | 0.44   | 0.44   | 0.43   | 0.44   | 0.44   | 0.44   | 0.44   | 0.44   | 0.44   | 0.43   | 0.43   | 0.42  | 0.42   | 0.43            |
| <b>Isorhamnetin-3-O-rutinoside</b>         | 1.18         | 1.15  | 1.18   | 1.19   | 1.17   | 1.17   | 1.18   | 1.20   | 1.19   | 1.17   | 1.17   | 1.17   | 1.16   | 1.14  | 1.12   | 1.17            |
| <b>Ferulic acid</b>                        | 1.70         | 1.66  | 1.71   | 1.72   | 1.69   | 1.69   | 1.71   | 1.73   | 1.71   | 1.70   | 1.70   | 1.68   | 1.67   | 1.64  | 1.61   | 1.68            |
| <b>Kaempferol-7-O-glucoside</b>            | 1.62         | 1.59  | 1.63   | 1.65   | 1.62   | 1.62   | 1.64   | 1.65   | 1.64   | 1.62   | 1.62   | 1.61   | 1.60   | 1.57  | 1.54   | 1.61            |
| <b>Apigenin</b>                            | 1.02         | 0.03  | 0.08   | 0.03   | 0.10   | 0.02   | 0.30   | 1.04   | 0.12   | 1.02   | 0.05   | 0.25   | 0.15   | 0.03  | 0.97   | 1.01            |
| <b>Luteolin</b>                            | 0.84         | 0.82  | 0.84   | 0.85   | 0.83   | 0.83   | 0.84   | 0.85   | 0.84   | 0.83   | 0.83   | 0.83   | 0.82   | 0.81  | 0.79   | 0.83            |
| <b>Eriodictyol</b>                         | 0.11         | 0.03  | 0.14   | 0.11   | 0.22   | 0.05   | 0.23   | 0.09   | 0.09   | 0.12   | 0.11   | 0.11   | 0.08   | 0.05  | 0.30   | 0.04            |
| <b>Gallic acid</b>                         | 1.21         | 1.19  | 1.22   | 1.23   | 1.21   | 1.21   | 1.22   | 1.24   | 1.23   | 1.21   | 1.21   | 1.20   | 1.20   | 1.18  | 1.16   | 1.21            |
| <b>Naringin</b>                            | 1.81         | 7.48  | 2.33   | 8.33   | 7.42   | 11.37  | 5.13   | 5.64   | 12.48  | 6.29   | 2.90   | 9.13   | 5.14   | 0.22  | 5.70   | 3.15            |

1 – refer to the table 4. in article (as a list of collected cultivars).

2 – S- standard, R- resistant, A- autocthtonous type of cultivar.

3 – expressed in g/kg equavilents gallic acid.

4 – expressed in mmol/kg trollox equavilents.

5 – expressed in mg/kg (all individual compounds presented in the table).

6 – sample unavvaible in 2018.

Table S1. Continued

| Tissue                               | Leaves |        |        |        |        |        |        |        |        |        |        |        |        |        |        |        |
|--------------------------------------|--------|--------|--------|--------|--------|--------|--------|--------|--------|--------|--------|--------|--------|--------|--------|--------|
| Year                                 | 2018   |        |        |        |        |        |        |        |        |        |        |        |        |        |        |        |
| Cultivar number <sup>1</sup>         | 1      | 2      | 3      | 4      | 5      | 6      | 7      | 8      | 9      | 10     | 11     | 12     | 13     | 14     | 15     | 16     |
| Type <sup>2</sup>                    | S      | S      | S      | S      | S      | R      | R      | R      | R      | R      | R      | A      | A      | A      | A      | A      |
| TPC <sup>3</sup>                     | 67.49  | 81.48  | 64.79  | 88.62  | 80.11  | 75.73  | 74.33  | 64.11  | 64.12  | 74.83  | 78.15  | 73.30  | 82.82  | 61.33  | 61.46  | 17.72  |
| RSA <sup>4</sup>                     | 7.97   | 11.85  | 10.54  | 7.56   | 9.63   | 11.77  | 7.77   | 6.40   | 9.17   | 8.41   | 10.79  | 7.47   | 12.48  | 6.51   | 6.10   | 5.19   |
| 5-O-Caffeoylquinic acid <sup>5</sup> | 69.97  | 87.97  | 77.77  | 46.30  | 63.93  | 102.49 | 69.72  | 101.33 | 74.58  | 79.63  | 60.49  | 71.43  | 178.55 | 116.43 | 105.90 | 23.52  |
| Caffeic acid                         | 1.62   | 2.55   | 3.19   | 1.59   | 2.38   | 3.08   | 1.87   | 2.37   | 1.87   | 1.68   | 1.46   | 1.98   | 3.95   | 1.03   | 1.41   | 0.30   |
| Phloretin                            | 81.67  | 38.85  | 61.83  | 243.70 | 273.32 | 285.53 | 58.16  | 416.08 | 392.33 | 235.46 | 213.48 | 400.51 | 179.21 | 208.41 | 360.40 | 85.56  |
| Phlorizin                            | 199.54 | 204.38 | 210.17 | 250.09 | 248.42 | 193.46 | 209.69 | 220.43 | 224.70 | 217.87 | 218.77 | 248.26 | 230.83 | 229.96 | 247.17 | 165.42 |
| Quercetin                            | 19.81  | 30.47  | 31.69  | 33.66  | 22.10  | 32.09  | 12.46  | 44.51  | 37.22  | 23.08  | 29.96  | 24.94  | 26.66  | 16.44  | 27.33  | 19.73  |
| Rutin                                | 54.80  | 127.08 | 82.18  | 107.59 | 82.98  | 115.36 | 64.08  | 81.14  | 90.62  | 70.31  | 67.29  | 67.40  | 155.58 | 62.05  | 146.33 | 58.48  |
| Quercetin-3-O-glucoside              | 305.18 | 369.76 | 371.53 | 374.11 | 354.41 | 334.67 | 319.32 | 383.49 | 331.67 | 320.93 | 295.91 | 317.13 | 386.58 | 327.65 | 338.94 | 197.56 |
| Quercetin-3-O-rhamnoside             | 177.11 | 254.60 | 216.40 | 246.63 | 216.21 | 254.79 | 194.56 | 247.87 | 312.50 | 294.45 | 197.15 | 123.18 | 222.76 | 158.18 | 202.10 | 105.73 |
| Isorhamnetin-3-O-glucoside           | 6.48   | 6.60   | 6.42   | 6.25   | 6.61   | 6.07   | 6.66   | 6.71   | 6.68   | 6.22   | 6.39   | 6.38   | 6.63   | 6.46   | 6.54   | 6.25   |
| Kaempferol                           | 1.61   | 3.30   | 2.71   | 2.06   | 2.50   | 3.34   | 1.69   | 3.91   | 4.12   | 2.63   | 3.01   | 0.95   | 2.09   | 1.66   | 3.64   | 1.99   |
| Naringenin                           | 13.97  | 5.87   | 9.83   | 43.66  | 45.19  | 51.53  | 9.75   | 74.58  | 70.05  | 41.03  | 37.02  | 71.53  | 31.94  | 37.36  | 63.96  | 13.91  |
| Protocatechuic acid                  | 6.98   | 4.24   | 3.46   | 3.30   | 3.61   | 6.08   | 6.40   | 5.00   | 4.94   | 5.27   | 6.41   | 8.48   | 7.73   | 5.99   | 4.64   | 3.16   |
| <i>p</i> -Hydroxybenzoic acid        | 0.84   | 1.16   | 0.89   | 0.37   | 0.47   | 1.77   | 2.20   | 0.71   | 0.68   | 1.05   | 0.13   | 1.18   | 2.13   | 1.71   | 2.01   | 0.41   |
| Catechin                             | 2.78   | 2.83   | 2.76   | 2.68   | 2.83   | 2.61   | 2.86   | 2.88   | 2.87   | 2.67   | 2.74   | 2.74   | 2.84   | 2.77   | 2.81   | 2.68   |
| <i>p</i> -Coumaric acid              | 1.27   | 1.94   | 1.52   | 2.66   | 2.05   | 1.90   | 1.90   | 1.80   | 1.52   | 1.54   | 1.40   | 2.12   | 2.70   | 1.47   | 1.71   | 0.61   |
| Isorhamnetin-3-O-rutinoside          | 1.81   | 1.84   | 1.79   | 1.74   | 1.84   | 1.69   | 1.86   | 1.87   | 1.86   | 1.73   | 1.78   | 1.78   | 1.85   | 1.80   | 1.82   | 1.74   |
| Ferulic acid                         | 2.61   | 2.66   | 2.59   | 2.52   | 2.66   | 2.44   | 2.68   | 2.70   | 2.69   | 2.50   | 2.57   | 2.57   | 2.67   | 2.60   | 2.63   | 2.52   |
| Kaempferol-7-O-glucoside             | 2.49   | 2.54   | 2.47   | 2.41   | 2.54   | 2.34   | 2.56   | 2.58   | 2.57   | 2.40   | 2.46   | 2.46   | 2.55   | 2.49   | 2.52   | 2.41   |
| Apigenin                             | 0.14   | 0.09   | 0.14   | 0.19   | 0.20   | 0.29   | 0.10   | 0.44   | 0.39   | 0.19   | 0.27   | 0.26   | 0.14   | 0.18   | 0.24   | 0.10   |
| Luteolin                             | 2.92   | 2.28   | 2.22   | 1.44   | 2.44   | 4.17   | 2.82   | 5.32   | 4.45   | 3.25   | 6.42   | 4.14   | 1.72   | 1.46   | 3.95   | 0.89   |
| Eriodictyol                          | 2.31   | 2.35   | 2.29   | 2.23   | 2.36   | 2.17   | 2.37   | 2.39   | 2.38   | 2.22   | 2.28   | 2.28   | 2.36   | 2.30   | 2.33   | 2.23   |
| Gallic acid                          | 0.96   | 0.56   | 0.33   | 0.17   | 0.37   | 0.80   | 0.93   | 0.47   | 0.46   | 0.56   | 0.80   | 1.18   | 0.94   | 0.61   | 0.33   | 0.22   |
| Naringin                             | 1.45   | 1.47   | 1.44   | 1.40   | 1.48   | 1.36   | 1.49   | 1.50   | 1.49   | 1.39   | 1.43   | 1.43   | 1.48   | 1.44   | 1.46   | 1.40   |

1 – refer to the table 4. in article (as a list of collected cultivars).

2 – S- standard, R- resistant, A- autocthtonous type of cultivar.

3 – expressed in g/kg equavilents gallic acid.

4 – expressed in mmol/kg trollox equavilents.

5 – expressed in mg/kg (all individual compounds presented in the table).

Table S1. Continued

| Tissue<br>Year                       | Leaves<br>2018  |        |        |        |        |        |        |        |        |        |        |        |        |        |        |        |    |
|--------------------------------------|-----------------|--------|--------|--------|--------|--------|--------|--------|--------|--------|--------|--------|--------|--------|--------|--------|----|
|                                      | Cultivar number | 16     | 17     | 18     | 19     | 20     | 21     | 22     | 23     | 24     | 25     | 26     | 27     | 28     | 29     | 30     | 31 |
| Type                                 | A               | A      | A      | A      | A      | A      | A      | A      | A      | A      | A      | A      | A      | A      | A      | A      | A  |
| TPC                                  | 17.72           | 71.47  | 76.08  | 80.27  | 74.85  | 74.78  | 78.97  | 47.51  | 79.92  | 80.48  | 62.65  | 65.22  | 74.37  | 56.85  | 87.86  | 73.03  |    |
| RSA                                  | 5.19            | 9.29   | 8.40   | 8.70   | 8.59   | 10.13  | 8.49   | 5.06   | 11.51  | 8.98   | 6.62   | 8.15   | 8.08   | 6.52   | 12.69  | 6.38   |    |
| 5-O-Caffeoylquinic acid <sup>5</sup> | 23.52           | 105.99 | 168.18 | 175.81 | 56.20  | 122.64 | 157.90 | 94.25  | 44.75  | 145.69 | 132.38 | 80.78  | 184.12 | 159.70 | 104.65 | 143.92 |    |
| Caffeic acid                         | 0.30            | 1.81   | 4.85   | 3.40   | 4.21   | 2.33   | 3.25   | 0.75   | 3.57   | 4.49   | 2.36   | 2.17   | 2.85   | 2.47   | 2.55   | 1.64   |    |
| Phloretin                            | 85.56           | 148.19 | 178.15 | 228.82 | 655.07 | 238.57 | 202.48 | 240.48 | 320.92 | 209.66 | 215.30 | 287.57 | 199.46 | 213.93 | 266.58 | 186.21 |    |
| Phlorizin                            | 165.42          | 232.89 | 218.39 | 222.56 | 211.29 | 232.89 | 222.65 | 224.53 | 226.29 | 225.23 | 257.46 | 245.26 | 227.80 | 222.09 | 243.40 | 224.66 |    |
| Quercetin                            | 19.73           | 25.78  | 31.86  | 33.00  | 34.44  | 28.91  | 22.12  | 5.68   | 27.64  | 31.55  | 20.08  | 24.60  | 23.82  | 17.97  | 30.60  | 39.96  |    |
| Rutin                                | 58.48           | 77.08  | 141.80 | 172.23 | 72.02  | 75.62  | 145.62 | 31.68  | 54.40  | 158.64 | 95.33  | 132.07 | 162.45 | 37.69  | 83.44  | 138.70 |    |
| Quercetin-3-O-glucoside              | 197.56          | 355.79 | 365.05 | 393.66 | 283.18 | 352.27 | 361.37 | 229.37 | 294.31 | 368.24 | 307.67 | 332.53 | 393.51 | 270.42 | 342.72 | 325.62 |    |
| Quercetin-3-O-rhamnoside             | 105.73          | 173.48 | 225.15 | 241.02 | 180.33 | 162.53 | 234.54 | 89.10  | 212.36 | 254.42 | 137.11 | 184.13 | 240.26 | 120.73 | 232.45 | 179.48 |    |
| Isorhamnetin-3-O-glucoside           | 6.25            | 6.68   | 6.18   | 6.31   | 6.10   | 6.49   | 6.24   | 6.69   | 6.39   | 6.47   | 6.62   | 6.71   | 6.44   | 6.45   | 6.22   | 6.05   |    |
| Kaempferol                           | 1.99            | 1.74   | 2.16   | 2.13   | 3.58   | 1.29   | 1.71   | 0.90   | 2.25   | 2.82   | 1.58   | 2.16   | 1.85   | 1.42   | 2.63   | 2.50   |    |
| Naringenin                           | 13.91           | 25.56  | 31.47  | 39.20  | 117.72 | 41.83  | 34.78  | 42.53  | 56.49  | 35.74  | 37.19  | 50.88  | 35.01  | 36.76  | 46.61  | 31.99  |    |
| Protocatechuic acid                  | 3.16            | 6.19   | 8.91   | 7.18   | 8.47   | 4.50   | 10.58  | 6.12   | 9.81   | 8.49   | 12.97  | 5.43   | 8.17   | 6.02   | 3.65   | 4.91   |    |
| <i>p</i> -Hydroxybenzoic acid        | 0.41            | 1.20   | 2.97   | 2.07   | 2.67   | 1.48   | 3.73   | 1.45   | 1.40   | 2.42   | 2.04   | 2.08   | 2.59   | 1.11   | 1.93   | 1.25   |    |
| Catechin                             | 2.68            | 2.86   | 2.65   | 2.71   | 2.62   | 2.78   | 2.68   | 2.87   | 2.74   | 2.77   | 2.84   | 2.88   | 2.76   | 2.77   | 2.67   | 2.60   |    |
| <i>p</i> -Coumaric acid              | 0.61            | 1.46   | 2.75   | 2.97   | 3.51   | 3.85   | 2.80   | 1.72   | 4.47   | 4.76   | 2.54   | 2.08   | 2.48   | 1.97   | 2.17   | 1.75   |    |
| Isorhamnetin-3-O-rutinoside          | 1.74            | 1.86   | 1.72   | 1.76   | 1.70   | 1.81   | 1.74   | 1.87   | 1.78   | 1.80   | 1.85   | 1.87   | 1.80   | 1.80   | 1.74   | 1.69   |    |
| Ferulic acid                         | 2.52            | 2.69   | 2.49   | 2.54   | 2.45   | 2.61   | 2.51   | 2.69   | 2.57   | 2.60   | 2.67   | 2.70   | 2.59   | 2.60   | 2.50   | 2.44   |    |
| Kaempferol-7-O-glucoside             | 2.41            | 2.57   | 2.38   | 2.43   | 2.35   | 2.50   | 2.40   | 2.58   | 2.46   | 2.49   | 2.55   | 2.58   | 2.48   | 2.49   | 2.40   | 2.33   |    |
| Apigenin                             | 0.10            | 0.14   | 0.16   | 0.17   | 0.39   | 0.19   | 0.17   | 0.24   | 0.23   | 0.16   | 0.22   | 0.22   | 0.19   | 0.19   | 0.21   | 0.21   |    |
| Luteolin                             | 0.89            | 2.17   | 2.55   | 2.30   | 6.65   | 2.40   | 2.40   | 1.78   | 3.96   | 3.23   | 2.16   | 2.75   | 1.98   | 2.04   | 2.30   | 3.07   |    |
| Eriodictyol                          | 2.23            | 2.38   | 2.20   | 2.25   | 2.18   | 2.31   | 2.23   | 2.39   | 2.28   | 2.31   | 2.36   | 2.39   | 2.30   | 2.30   | 2.22   | 2.16   |    |
| Gallic acid                          | 0.22            | 0.53   | 1.41   | 0.77   | 1.28   | 0.49   | 2.23   | 0.93   | 1.20   | 1.05   | 1.88   | 0.44   | 1.00   | 0.79   | 0.35   | 0.37   |    |
| Naringin                             | 1.40            | 1.49   | 1.38   | 1.41   | 1.36   | 1.45   | 1.39   | 1.49   | 1.43   | 1.44   | 1.48   | 1.50   | 1.44   | 1.44   | 1.39   | 1.35   |    |

1 – refer to the table 4. in article (as a list of collected cultivars).

2 – S- standard, R- resistant, A- autocthonous type of cultivar.

3 – expressed in g/kg equavilents gallic acid.

4 – expressed in mmol/kg trollox equavilents.

5 – expressed in mg/kg (all individual compounds presented in the table).

Table S1. Continued

| Tissue                               | Leaves |        |        |        |        |        |        |        |        |        |        |        |        |        |        |
|--------------------------------------|--------|--------|--------|--------|--------|--------|--------|--------|--------|--------|--------|--------|--------|--------|--------|
| Year                                 | 2019   |        |        |        |        |        |        |        |        |        |        |        |        |        |        |
| Cultivar number                      | 1      | 2      | 3      | 4      | 5      | 6      | 7      | 8      | 9      | 10     | 11     | 12     | 13     | 14     | 15     |
| Type                                 | S      | S      | S      | S      | S      | R      | R      | R      | R      | R      | R      | A      | A      | A      | A      |
| TPC                                  | 99.11  | 104.32 | 92.19  | 104.61 | 97.69  | 93.21  | 88.89  | 80.14  | 104.32 | 97.56  | 87.28  | 91.59  | 83.93  | 88.64  | 73.83  |
| RSA                                  | 9.26   | 13.62  | 14.04  | 11.10  | 8.28   | 13.68  | 9.68   | 10.15  | 11.02  | 12.59  | 12.00  | 9.24   | 9.32   | 8.89   | 7.64   |
| 5-O-Caffeoylquinic acid <sup>5</sup> | 112.33 | 72.55  | 97.00  | 70.45  | 59.14  | 78.24  | 89.20  | 103.18 | 72.44  | 75.41  | 43.34  | 132.30 | 200.04 | 242.98 | 116.82 |
| Caffeic acid                         | 1.88   | 2.16   | 2.06   | 2.24   | 0.67   | 3.96   | 2.80   | 2.91   | 1.34   | 2.72   | 0.92   | 0.70   | 1.39   | 0.63   | 0.08   |
| Phloretin                            | 188.52 | 51.72  | 126.03 | 90.88  | 140.59 | 497.00 | 105.71 | 597.85 | 220.90 | 122.93 | 161.32 | 269.55 | 135.03 | 213.52 | 242.57 |
| Phlorizin                            | 253.11 | 228.54 | 231.57 | 235.20 | 251.79 | 230.63 | 242.11 | 238.54 | 228.33 | 234.58 | 240.02 | 268.79 | 269.32 | 252.44 | 241.14 |
| Quercetin                            | 17.68  | 26.59  | 26.10  | 18.59  | 19.26  | 33.32  | 12.98  | 27.70  | 21.80  | 19.54  | 17.88  | 15.32  | 17.04  | 9.99   | 10.68  |
| Rutin                                | 92.10  | 159.94 | 115.69 | 122.18 | 81.83  | 144.17 | 138.99 | 97.31  | 98.87  | 80.60  | 86.36  | 84.34  | 125.94 | 60.74  | 216.52 |
| Quercetin-3-O-glucoside              | 354.14 | 396.65 | 383.94 | 358.79 | 315.92 | 382.91 | 366.63 | 392.95 | 321.76 | 342.39 | 326.39 | 289.45 | 334.62 | 279.36 | 346.06 |
| Quercetin-3-O-rhamnoside             | 173.90 | 243.92 | 200.04 | 207.81 | 200.54 | 274.48 | 191.40 | 253.26 | 283.70 | 325.70 | 190.68 | 104.11 | 218.95 | 116.53 | 203.14 |
| Isorhamnetin-3-O-glucoside           | 6.11   | 6.62   | 6.05   | 6.10   | 6.34   | 6.25   | 6.59   | 6.43   | 6.51   | 6.65   | 6.71   | 6.15   | 6.61   | 6.47   | 6.14   |
| Kaempferol                           | 1.29   | 2.28   | 1.54   | 1.14   | 1.49   | 2.55   | 1.34   | 2.31   | 1.71   | 1.57   | 2.34   | 0.78   | 1.74   | 1.00   | 1.55   |
| Naringenin                           | 33.90  | 8.85   | 21.88  | 16.31  | 25.82  | 88.31  | 18.78  | 103.31 | 37.78  | 22.24  | 29.53  | 46.42  | 24.67  | 37.93  | 43.59  |
| Protocatechuic acid                  | 3.58   | 2.54   | 1.66   | 1.93   | 1.82   | 2.99   | 2.94   | 2.19   | 2.25   | 2.23   | 2.95   | 4.67   | 5.25   | 4.00   | 1.92   |
| <i>p</i> -Hydroxybenzoic acid        | 0.77   | 0.36   | 0.61   | 0.11   | 0.09   | 1.38   | 0.24   | 0.90   | 0.27   | 0.07   | 0.14   | 2.63   | 0.96   | 1.39   | 0.27   |
| Catechin                             | 2.62   | 2.84   | 2.60   | 2.62   | 2.72   | 2.68   | 2.83   | 2.76   | 2.79   | 2.85   | 2.88   | 2.64   | 2.84   | 2.78   | 2.64   |
| <i>p</i> -Coumaric acid              | 1.51   | 0.67   | 1.14   | 1.89   | 1.87   | 2.16   | 0.56   | 0.76   | 0.59   | 0.49   | 1.07   | 0.39   | 2.14   | 1.62   | 0.20   |
| Isorhamnetin-3-O-rutinoside          | 1.70   | 1.85   | 1.69   | 1.70   | 1.77   | 1.74   | 1.84   | 1.79   | 1.81   | 1.85   | 1.87   | 1.71   | 1.84   | 1.80   | 1.71   |
| Ferulic acid                         | 2.46   | 2.66   | 2.44   | 2.45   | 2.55   | 2.51   | 2.65   | 2.59   | 2.62   | 2.67   | 2.70   | 2.47   | 2.66   | 2.60   | 2.47   |
| Kaempferol-7-O-glucoside             | 2.35   | 2.55   | 2.33   | 2.35   | 2.44   | 2.41   | 2.54   | 2.48   | 2.51   | 2.56   | 2.58   | 2.37   | 2.54   | 2.49   | 2.37   |
| Apigenin                             | 0.12   | 0.10   | 0.10   | 0.08   | 0.08   | 0.38   | 0.10   | 0.35   | 0.18   | 0.13   | 0.20   | 0.13   | 0.07   | 0.14   | 0.14   |
| Luteolin                             | 2.14   | 1.96   | 1.68   | 1.90   | 1.87   | 4.05   | 2.46   | 3.55   | 3.08   | 3.61   | 6.34   | 2.09   | 0.87   | 1.42   | 1.16   |
| Eriodictyol                          | 2.18   | 2.36   | 2.16   | 2.18   | 2.26   | 2.23   | 2.35   | 2.29   | 2.32   | 2.37   | 2.39   | 2.19   | 2.36   | 2.31   | 2.19   |
| Gallic acid                          | 0.25   | 0.12   | 0.09   | 0.21   | 0.21   | 0.29   | 0.20   | 0.18   | 0.07   | 0.17   | 0.33   | 0.55   | 0.50   | 0.55   | 0.26   |
| Naringin                             | 1.37   | 1.48   | 1.35   | 1.36   | 1.42   | 1.40   | 1.47   | 1.44   | 1.45   | 1.49   | 1.50   | 1.37   | 1.48   | 1.45   | 1.37   |

1 – refer to the table 4. in article.

2 – S- standard, R- resistant, A- autocthtonous.

3 – expressed in g/kg equavilents gallic acid.

4 – expressed in mmol/kg trollox equavilents.

5 – expressed in mg/kg.

Table S1. Continued

| Tissue<br>Year                                | Leaves<br>2019 |        |        |        |        |        |        |        |        |        |        |        |        |        |        |        |
|-----------------------------------------------|----------------|--------|--------|--------|--------|--------|--------|--------|--------|--------|--------|--------|--------|--------|--------|--------|
| Cultivar number                               | 16             | 17     | 18     | 19     | 20     | 21     | 22     | 23     | 24     | 25     | 26     | 27     | 28     | 29     | 30     | 31     |
| Type                                          | A              | A      | A      | A      | A      | A      | A      | A      | A      | A      | A      | A      | A      | A      | A      | A      |
| TPC                                           | 82.71          | 100.83 | 97.17  | 114.02 | 87.64  | 94.29  | 75.30  | 97.00  | 94.84  | 90.64  | 93.30  | 90.62  | 83.16  | 82.25  | 121.22 | 83.39  |
| RSA                                           | 7.12           | 8.61   | 7.90   | 8.15   | 10.31  | 9.36   | 5.23   | 11.15  | 8.31   | 7.54   | 9.41   | 7.82   | 8.02   | 8.29   | 13.97  | 7.71   |
| 5- <i>O</i> -Caffeoylquinic acid <sup>5</sup> | 189.53         | 224.23 | 210.63 | 79.55  | 55.35  | 223.15 | 106.94 | 78.22  | 190.50 | 136.59 | 121.52 | 229.52 | 116.12 | 242.99 | 209.62 | 160.25 |
| Caffeic acid                                  | 0.92           | 1.93   | 1.34   | 3.10   | 1.19   | 2.20   | 0.56   | 1.53   | 1.77   | 0.72   | 0.79   | 1.90   | 0.56   | 2.07   | 1.51   | 0.66   |
| Phloretin                                     | 126.41         | 163.90 | 256.99 | 544.91 | 293.43 | 199.88 | 128.12 | 274.40 | 185.14 | 297.98 | 268.46 | 161.32 | 261.81 | 282.64 | 184.23 | 149.25 |
| Phlorizin                                     | 240.02         | 266.35 | 264.01 | 272.20 | 251.33 | 252.47 | 262.87 | 247.11 | 248.61 | 265.01 | 280.90 | 264.56 | 233.19 | 253.84 | 290.45 | 269.54 |
| Quercetin                                     | 7.25           | 19.52  | 10.60  | 18.80  | 14.26  | 15.26  | 3.85   | 10.76  | 12.66  | 14.35  | 13.87  | 13.06  | 19.12  | 12.59  | 15.35  | 5.80   |
| Rutin                                         | 62.92          | 127.96 | 64.86  | 139.53 | 174.71 | 208.55 | 60.76  | 153.82 | 198.98 | 116.67 | 164.08 | 129.63 | 109.16 | 42.79  | 153.06 | 136.41 |
| Quercetin-3- <i>O</i> -glucoside              | 286.96         | 351.21 | 311.45 | 307.52 | 354.91 | 390.78 | 247.85 | 340.41 | 365.74 | 286.16 | 320.22 | 358.97 | 351.30 | 260.74 | 378.47 | 310.27 |
| Quercetin-3- <i>O</i> -rhamnoside             | 131.37         | 226.48 | 138.41 | 196.13 | 198.34 | 231.58 | 101.46 | 214.89 | 234.91 | 158.03 | 182.02 | 210.69 | 226.34 | 135.41 | 215.72 | 160.56 |
| Isorhamnetin-3- <i>O</i> -glucoside           | 6.33           | 6.52   | 6.41   | 6.72   | 6.30   | 6.53   | 6.56   | 6.29   | 6.34   | 6.34   | 6.46   | 6.62   | 6.22   | 6.26   | 7.07   | 6.70   |
| Kaempferol                                    | 1.04           | 1.61   | 0.89   | 1.27   | 0.75   | 1.32   | 0.94   | 1.44   | 1.17   | 1.67   | 2.12   | 1.68   | 2.28   | 1.66   | 1.58   | 1.40   |
| Naringenin                                    | 22.62          | 29.44  | 46.52  | 98.54  | 51.25  | 34.15  | 22.56  | 48.41  | 32.64  | 53.14  | 48.59  | 28.57  | 46.33  | 49.35  | 33.64  | 25.81  |
| Protocatechuic acid                           | 3.59           | 5.09   | 2.46   | 4.96   | 5.34   | 4.41   | 3.01   | 3.97   | 3.82   | 6.84   | 2.80   | 5.26   | 1.62   | 4.44   | 3.78   | 3.28   |
| <i>p</i> -Hydroxybenzoic acid                 | 0.51           | 0.68   | 0.96   | 2.50   | 1.36   | 1.13   | 2.35   | 2.33   | 1.35   | 1.99   | 2.08   | 0.94   | 0.59   | 1.11   | 1.48   | 1.70   |
| Catechin                                      | 2.71           | 2.80   | 2.75   | 2.88   | 2.70   | 2.80   | 2.82   | 2.70   | 2.72   | 2.72   | 2.77   | 2.84   | 2.67   | 2.69   | 3.03   | 2.88   |
| <i>p</i> -Coumaric acid                       | 1.26           | 1.96   | 1.65   | 4.27   | 1.36   | 0.93   | 0.39   | 2.36   | 2.89   | 2.07   | 1.67   | 2.57   | 1.43   | 2.00   | 2.16   | 1.86   |
| Isorhamnetin-3- <i>O</i> -rutinoside          | 1.76           | 1.82   | 1.79   | 1.87   | 1.76   | 1.82   | 1.83   | 1.75   | 1.77   | 1.77   | 1.80   | 1.85   | 1.73   | 1.75   | 1.97   | 1.87   |
| Ferulic acid                                  | 2.55           | 2.62   | 2.58   | 2.70   | 2.53   | 2.63   | 2.64   | 2.53   | 2.55   | 2.55   | 2.60   | 2.66   | 2.50   | 2.52   | 2.84   | 2.70   |
| Kaempferol-7- <i>O</i> -glucoside             | 2.44           | 2.51   | 2.47   | 2.59   | 2.42   | 2.52   | 2.53   | 2.42   | 2.44   | 2.44   | 2.49   | 2.55   | 2.40   | 2.41   | 2.72   | 2.58   |
| Apigenin                                      | 0.08           | 0.10   | 0.13   | 0.23   | 0.15   | 0.11   | 0.12   | 0.14   | 0.14   | 0.17   | 0.14   | 0.08   | 0.16   | 0.15   | 0.15   | 0.11   |
| Luteolin                                      | 1.28           | 0.86   | 1.36   | 4.05   | 1.82   | 1.04   | 1.73   | 2.15   | 1.15   | 1.76   | 0.46   | 0.95   | 1.59   | 2.01   | 0.95   | 1.30   |
| Eriodictyol                                   | 2.26           | 2.32   | 2.29   | 2.39   | 2.24   | 2.33   | 2.34   | 2.24   | 2.26   | 2.26   | 2.30   | 2.36   | 2.22   | 2.23   | 2.52   | 2.39   |
| Gallic acid                                   | 0.41           | 0.63   | 0.27   | 0.63   | 0.70   | 0.41   | 0.28   | 0.58   | 0.52   | 0.81   | 0.33   | 0.65   | 0.04   | 0.53   | 0.59   | 0.27   |
| Naringin                                      | 1.41           | 1.46   | 1.43   | 1.50   | 1.41   | 1.46   | 1.47   | 1.41   | 1.42   | 1.42   | 1.44   | 1.48   | 1.39   | 1.40   | 1.58   | 1.50   |

1 – refer to the table 4. in article (as a list of collected cultivars).

2 – S- standard, R- resistant, A- autocthtonous type of cultivar.

3 – expressed in g/kg equavilents gallic acid.

4 – expressed in mmol/kg trollox equavilents.

5 – expressed in mg/kg (all individual compounds presented in the table).

**Table S2.** Comparison of TPC values in different cultivar groups and years. Letters a-f denotes the grouping according to Tukey's HSD test at 0.95 confidence level.

| Cultivar group | Sample   | Range, year 2018<br>(mg/kg eq GA) | Range, year 2019<br>(mg/kg eq GA) |
|----------------|----------|-----------------------------------|-----------------------------------|
| Standard       | mesocarp | 456 – 1413 <sup>a,b</sup>         | 100 – 734 <sup>a,b</sup>          |
|                | peel     | 3432 – 6508 <sup>a,b</sup>        | 9700 – 24892 <sup>c</sup>         |
|                | leaf     | 64794 – 88620 <sup>d,f</sup>      | 92191 – 104608 <sup>e</sup>       |
| Resistant      | mesocarp | 333 – 640 <sup>a,b</sup>          | 125 – 703 <sup>a,b</sup>          |
|                | peel     | 3134 – 5444 <sup>a,b</sup>        | 7693 – 18368 <sup>b,c</sup>       |
|                | leaf     | 64117 – 78149 <sup>d</sup>        | 80136 – 104320 <sup>e,f</sup>     |
| Autochthonous  | mesocarp | 737 – 4420 <sup>a,b</sup>         | 813 – 2591 <sup>a</sup>           |
|                | peel     | 4348 – 10591 <sup>a,b</sup>       | 18332 – 39054 <sup>c</sup>        |
|                | leaf     | 17724 – 87858 <sup>d</sup>        | 73834 – 121224 <sup>e</sup>       |

**Table S3.** Comparison of DPPH radical inhibition values in different cultivar groups and years. Letters a-d denotes the grouping according to Tukey's HSD test at 0.95 confidence level.

| Cultivar group | Sample   | Range, year 2018<br>( $\mu\text{mol/kg eq trolox}$ ) | Range, year 2019<br>( $\mu\text{mol/kg eq trolox}$ ) |
|----------------|----------|------------------------------------------------------|------------------------------------------------------|
| Standard       | mesocarp | 8940 – 20969 <sup>a,b,c</sup>                        | 7795 – 9644 <sup>a,b</sup>                           |
|                | peel     | 29337 – 57636 <sup>d,e</sup>                         | 23556 – 113338 <sup>d,e</sup>                        |
|                | leaf     | 7557 – 11853 <sup>a,b</sup>                          | 8282 – 14039 <sup>a,b</sup>                          |
| Resistant      | mesocarp | 7977 – 19732 <sup>a,b</sup>                          | 7750 – 9579 <sup>a,b</sup>                           |
|                | peel     | 26280 – 61208 <sup>c,d,e</sup>                       | 21842 – 35450 <sup>b,c,d</sup>                       |
|                | leaf     | 6403 – 11770 <sup>a,b</sup>                          | 9683 – 11677 <sup>a,b</sup>                          |
| Autochthonous  | mesocarp | 8479 – 45523 <sup>a,b</sup>                          | 6028 – 11912 <sup>a,b</sup>                          |
|                | peel     | 29512 – 49346 <sup>c,d,e</sup>                       | 23476 – 124545 <sup>b,c,d</sup>                      |
|                | leaf     | 5056 – 12687 <sup>a,b</sup>                          | 5231 – 12687 <sup>a,b</sup>                          |

**Table S4.** Univariate test for significance of factor effects influencing total phenolic content (TPC) and DPPH radical scavenging activity (RSA) in the analysed samples. DF – Degrees of freedom; SS – Sum of squares; MS – Mean squares. Factors:  $F_1$  – represents the three tissue types (mesocarp, peel and leaf),  $F_2$  – describes the differences among the three apple cultivars (autochthonous, standard and resistant) and  $F_3$  – is corresponding to the years of production.

| Factor                      | DF | TPC                   |                       |         |         | RSA                   |                       |        |         |
|-----------------------------|----|-----------------------|-----------------------|---------|---------|-----------------------|-----------------------|--------|---------|
|                             |    | SS                    | MS                    | F       | p       | SS                    | MS                    | F      | p       |
| Intercept                   | 1  | $1.35 \times 10^{11}$ | $1.35 \times 10^{11}$ | 2345.76 | <0.001* | $6.05 \times 10^{10}$ | $6.05 \times 10^{10}$ | 431.11 | <0.001* |
| $F_1$                       | 2  | $1.72 \times 10^{11}$ | $8.59 \times 10^{10}$ | 1495.48 | <0.001* | $2.73 \times 10^{10}$ | $1.37 \times 10^{10}$ | 97.35  | <0.001* |
| $F_2$                       | 2  | $2.09 \times 10^8$    | $1.04 \times 10^8$    | 1.82    | 0.166   | $6.26 \times 10^8$    | $3.13 \times 10^8$    | 2.23   | 0.111   |
| $F_3$                       | 1  | $4.77 \times 10^9$    | $4.77 \times 10^9$    | 82.92   | <0.001* | $1.03 \times 10^8$    | $1.03 \times 10^8$    | 0.74   | 0.392   |
| $F_1 \times F_2$            | 4  | $6.88 \times 10^8$    | $1.72 \times 10^8$    | 2.99    | 0.020*  | $1.06 \times 10^9$    | $2.65 \times 10^8$    | 1.89   | 0.114   |
| $F_2 \times F_3$            | 2  | $2.70 \times 10^9$    | $1.35 \times 10^9$    | 23.53   | <0.001* | $6.67 \times 10^8$    | $3.33 \times 10^8$    | 2.38   | 0.096   |
| $F_2 \times F_3$            | 2  | $6.74 \times 10^7$    | $3.37 \times 10^7$    | 0.59    | 0.558   | $1.95 \times 10^8$    | $9.73 \times 10^7$    | 0.69   | 0.501   |
| $F_1 \times F_2 \times F_3$ | 4  | $6.18 \times 10^7$    | $1.54 \times 10^7$    | 0.27    | 0.898   | $9.21 \times 10^8$    | $2.30 \times 10^8$    | 1.64   | 0.166   |

Statistically significant results at  $p = 0.05$  are denoted with \*

Table S5. Overview of detected compounds by OrbiTrap in mesocarp of the analyzed samples.

| No | Compound name                                             | Cultivar number <sup>1,2</sup> |   |   |    |    |    |    |    |    |    |    |    |
|----|-----------------------------------------------------------|--------------------------------|---|---|----|----|----|----|----|----|----|----|----|
|    |                                                           | 2                              | 3 | 9 | 11 | 12 | 13 | 14 | 15 | 16 | 17 | 18 | 19 |
| 1  | Protocatechuic acid hexoside                              | +                              | + | + | +  | +  | +  | +  | +  | +  | +  | +  | +  |
| 2  | Protocatechuic acid                                       | +                              | + | + | +  | +  | +  | +  | +  | +  | +  | +  | +  |
| 3  | Protocatechuic acid pentosylhexoside                      | +                              | - | + | -  | -  | -  | +  | +  | +  | -  | +  | +  |
| 4  | Caffeoyl hexoside 1                                       | +                              | + | + | -  | +  | +  | +  | -  | -  | +  | +  | +  |
| 5  | <i>p</i> -Coumaric acid                                   | +                              | + | + | -  | +  | +  | -  | -  | +  | +  | +  | +  |
| 6  | Caffeoyl hexoside 2                                       | +                              | + | + | -  | -  | +  | +  | +  | +  | +  | +  | +  |
| 7  | Caffeoyl hexoside 3                                       | +                              | + | + | +  | +  | +  | +  | +  | +  | +  | +  | +  |
| 8  | 5- <i>O</i> -Caffeoylquinic acid                          | +                              | + | + | +  | +  | +  | +  | +  | +  | +  | +  | +  |
| 9  | <i>p</i> -Coumaric acid hexoside                          | +                              | + | + | +  | +  | +  | +  | +  | +  | +  | +  | +  |
| 10 | 5- <i>O</i> -Caffeoylquinic acid isomer                   | +                              | + | + | +  | +  | +  | +  | +  | +  | +  | +  | +  |
| 11 | Methyl-3- <i>O</i> -caffeoylquinic acid                   | -                              | - | - | +  | +  | +  | -  | +  | +  | -  | -  | +  |
| 12 | 3- <i>p</i> -Coumaroylquinic acid                         | +                              | + | + | +  | +  | +  | +  | +  | +  | +  | +  | +  |
| 13 | Methyl 5- <i>O</i> -caffeoylquinic acid                   | +                              | + | + | +  | +  | +  | +  | +  | +  | +  | +  | +  |
| 14 | Caffeic acid                                              | -                              | + | + | -  | +  | +  | -  | +  | +  | +  | +  | +  |
| 15 | Methyl 3- <i>p</i> -coumaroylquinic acid                  | +                              | + | - | +  | +  | +  | +  | +  | +  | +  | +  | +  |
| 16 | Methyl 5- <i>O</i> -caffeoylquinic acid isomer            | +                              | + | + | +  | +  | +  | +  | +  | +  | +  | +  | +  |
| 17 | Methyl 5- <i>p</i> -coumaroylquinic acid                  | +                              | + | + | +  | +  | +  | +  | +  | +  | +  | +  | +  |
| 18 | Methyl 5- <i>p</i> -coumaroylquinic acid isomer           | +                              | + | + | +  | +  | +  | +  | +  | +  | +  | +  | +  |
| 19 | Rosmarinic acid                                           | +                              | + | + | +  | +  | +  | +  | +  | +  | +  | +  | +  |
| 20 | Caffeoyl-feruloylquinic acid                              | -                              | + | - | -  | +  | +  | -  | +  | -  | +  | +  | +  |
| 21 | Prodelphinidin B type ((epi)gallocatechin-(epi)catechin)  | +                              | + | + | +  | +  | +  | +  | +  | +  | +  | +  | +  |
| 22 | (Epi)catechin-hexoside                                    | +                              | + | - | -  | +  | +  | -  | +  | -  | +  | +  | +  |
| 23 | Procyanidin B type 1 (catechin-(epi)catechin)             | +                              | + | + | +  | +  | +  | +  | +  | +  | +  | +  | +  |
| 24 | Epiafzelechin 3- <i>O</i> -gallate                        | +                              | + | + | +  | +  | -  | +  | +  | +  | +  | +  | +  |
| 25 | Procyanidin B type 2 (catechin-(epi)catechin)             | +                              | + | + | +  | +  | +  | +  | +  | +  | +  | +  | +  |
| 26 | Catechin                                                  | +                              | + | + | +  | +  | +  | +  | +  | +  | +  | +  | +  |
| 27 | Procyanidin B type 3 (catechin-(epi)catechin)             | +                              | + | + | +  | +  | +  | +  | +  | +  | +  | +  | +  |
| 28 | Epicatechin                                               | +                              | + | + | +  | +  | +  | +  | +  | +  | +  | +  | +  |
| 29 | (Epi)catechin-methyl(epi)gallocatechin                    | +                              | + | + | +  | +  | +  | +  | +  | +  | +  | +  | +  |
| 30 | Taxifolin                                                 | +                              | + | - | -  | +  | +  | +  | -  | +  | +  | +  | +  |
| 31 | Quercetin 3- <i>O</i> -rhamnoside                         | +                              | + | + | +  | +  | +  | +  | +  | +  | +  | +  | +  |
| 32 | Kaempferol 3- <i>O</i> -pentoside                         | +                              | + | - | -  | -  | -  | -  | -  | +  | -  | +  | +  |
| 33 | Kaempferol 3- <i>O</i> -rhamnoside                        | +                              | + | + | +  | +  | +  | +  | -  | -  | +  | +  | +  |
| 34 | Phloretin 2'- <i>O</i> -(2''- <i>O</i> -pentosylhexoside) | +                              | + | + | +  | +  | +  | +  | +  | +  | +  | +  | +  |
| 35 | Phloretin                                                 | +                              | + | + | +  | +  | +  | +  | +  | +  | +  | +  | +  |
| 36 | Phloretin 2'- <i>O</i> -hexoside (Phloridzin)             | +                              | + | + | +  | +  | +  | +  | +  | +  | +  | +  | +  |

1 – refer to the table 4. in article (as a list of collected cultivars)

2 – the detected compound is denoted with +, otherwise with -

Table S5. continued

| No | Compound name                                             | Cultivar number <sup>1,2</sup> |    |    |    |    |    |    |    |    |    |    |    |
|----|-----------------------------------------------------------|--------------------------------|----|----|----|----|----|----|----|----|----|----|----|
|    |                                                           | 20                             | 21 | 22 | 23 | 24 | 25 | 26 | 27 | 28 | 29 | 30 | 31 |
| 1  | Protocatechuic acid hexoside                              | +                              | +  | +  | +  | +  | +  | +  | +  | +  | +  | +  | +  |
| 2  | Protocatechuic acid                                       | +                              | +  | +  | +  | +  | +  | +  | +  | +  | +  | +  | +  |
| 3  | Protocatechuic acid pentosylhexoside                      | +                              | -  | +  | +  | -  | +  | +  | -  | +  | +  | +  | +  |
| 4  | Caffeoyl hexoside 1                                       | +                              | -  | +  | +  | -  | +  | +  | -  | +  | +  | +  | +  |
| 5  | <i>p</i> -Coumaric acid                                   | +                              | +  | -  | +  | +  | +  | +  | +  | +  | +  | +  | +  |
| 6  | Caffeoyl hexoside 2                                       | +                              | +  | +  | +  | +  | +  | +  | +  | +  | +  | +  | +  |
| 7  | Caffeoyl hexoside 3                                       | +                              | +  | +  | +  | +  | +  | +  | +  | +  | +  | +  | +  |
| 8  | 5- <i>O</i> -Caffeoylquinic acid                          | +                              | +  | +  | +  | +  | +  | +  | +  | +  | +  | +  | +  |
| 9  | <i>p</i> -Coumaric acid hexoside                          | +                              | +  | +  | +  | +  | +  | +  | +  | -  | +  | +  | +  |
| 10 | 5- <i>O</i> -Caffeoylquinic acid isomer                   | +                              | +  | +  | +  | +  | +  | +  | +  | +  | +  | +  | +  |
| 11 | Methyl-3- <i>O</i> -caffeoylquinic acid                   | -                              | -  | -  | -  | -  | -  | +  | -  | -  | -  | -  | -  |
| 12 | 3- <i>p</i> -Coumaroylquinic acid                         | +                              | +  | +  | +  | +  | +  | +  | +  | +  | +  | +  | +  |
| 13 | Methyl 5- <i>O</i> -caffeoylquinic acid                   | +                              | +  | +  | +  | +  | +  | +  | +  | +  | +  | +  | +  |
| 14 | Caffeic acid                                              | +                              | +  | -  | +  | +  | +  | +  | +  | +  | +  | +  | +  |
| 15 | Methyl 3- <i>p</i> -coumaroylquinic acid                  | +                              | +  | +  | +  | +  | +  | +  | +  | +  | +  | +  | +  |
| 16 | Methyl 5- <i>O</i> -caffeoylquinic acid isomer            | +                              | +  | +  | +  | +  | +  | +  | +  | +  | +  | +  | +  |
| 17 | Methyl 5- <i>p</i> -coumaroylquinic acid                  | +                              | +  | +  | +  | +  | +  | +  | +  | +  | +  | +  | +  |
| 18 | Methyl 5- <i>p</i> -coumaroylquinic acid isomer           | +                              | +  | +  | +  | +  | +  | +  | +  | +  | +  | +  | +  |
| 19 | Rosmarinic acid                                           | +                              | +  | +  | +  | +  | +  | +  | +  | +  | +  | -  | +  |
| 20 | Caffeoyl-feruloylquinic acid                              | +                              | +  | -  | +  | +  | +  | +  | +  | -  | +  | -  | +  |
| 21 | Prodelphinidin B type ((epi)gallocatechin-(epi)catechin)  | +                              | +  | +  | +  | +  | +  | +  | +  | +  | +  | +  | +  |
| 22 | (Epi)catechin-hexoside                                    | +                              | +  | -  | +  | +  | +  | +  | +  | +  | +  | +  | +  |
| 23 | Procyanidin B type 1 (catechin-(epi)catechin)             | +                              | +  | -  | +  | +  | +  | +  | +  | +  | +  | +  | +  |
| 24 | Epiarfaezelechin 3- <i>O</i> -gallate                     | +                              | +  | +  | +  | +  | +  | +  | +  | +  | +  | +  | +  |
| 25 | Procyanidin B type 2 (catechin-(epi)catechin)             | +                              | +  | +  | +  | +  | +  | +  | +  | +  | +  | +  | +  |
| 26 | Catechin                                                  | +                              | +  | +  | +  | +  | +  | +  | +  | +  | +  | +  | +  |
| 27 | Procyanidin B type 3 (catechin-(epi)catechin)             | +                              | +  | +  | +  | +  | +  | +  | +  | +  | +  | +  | +  |
| 28 | Epicatechin                                               | +                              | +  | +  | -  | +  | +  | +  | +  | +  | +  | +  | -  |
| 29 | (Epi)catechin-methyl(epi)gallocatechin                    | +                              | +  | +  | +  | +  | +  | +  | +  | +  | +  | +  | +  |
| 30 | Taxifolin                                                 | +                              | +  | +  | -  | +  | +  | +  | +  | +  | +  | +  | +  |
| 31 | Quercetin 3- <i>O</i> -rhamnoside                         | +                              | +  | +  | +  | +  | +  | +  | +  | +  | +  | +  | +  |
| 32 | Kaempferol 3- <i>O</i> -pentoside                         | -                              | -  | -  | +  | -  | +  | +  | -  | -  | +  | +  | +  |
| 33 | Kaempferol 3- <i>O</i> -rhamnoside                        | +                              | -  | +  | +  | -  | +  | +  | +  | -  | +  | +  | +  |
| 34 | Phloretin 2'- <i>O</i> -(2''- <i>O</i> -pentosylhexoside) | +                              | +  | +  | +  | +  | +  | +  | +  | +  | +  | +  | +  |
| 35 | Phloretin                                                 | +                              | +  | +  | +  | +  | +  | +  | +  | +  | +  | +  | +  |
| 36 | Phloretin 2'- <i>O</i> -hexoside (Phloridzin)             | +                              | +  | +  | +  | +  | +  | +  | +  | +  | +  | +  | +  |

1 – refer to the table 4. in article (as a list of collected cultivars)

2 – the detected compound is denoted with +, otherwise with -
